# Supplementary material for: Synthesis and Biological Evaluation of Novel Fusidic Acid Derivatives as Two-in-One Agent with Potent Antibacterial and Anti-Inflammatory Activity
Source: MDPI journal article supplement (doi:10.3390/antibiotics11081026), 2022-07-30
Supplement: s1 [file s1]

# Supplementary Material

Original  $^1\text{H}$ ,  $^{13}\text{C}$  NMR and ESI-HRMS spectra of target compounds (FA-1 ~ FA-26)

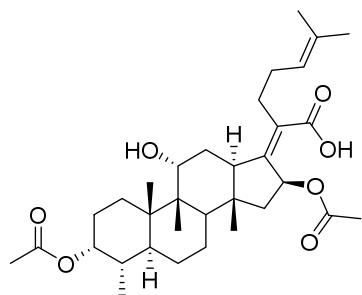

Structure of FA-1

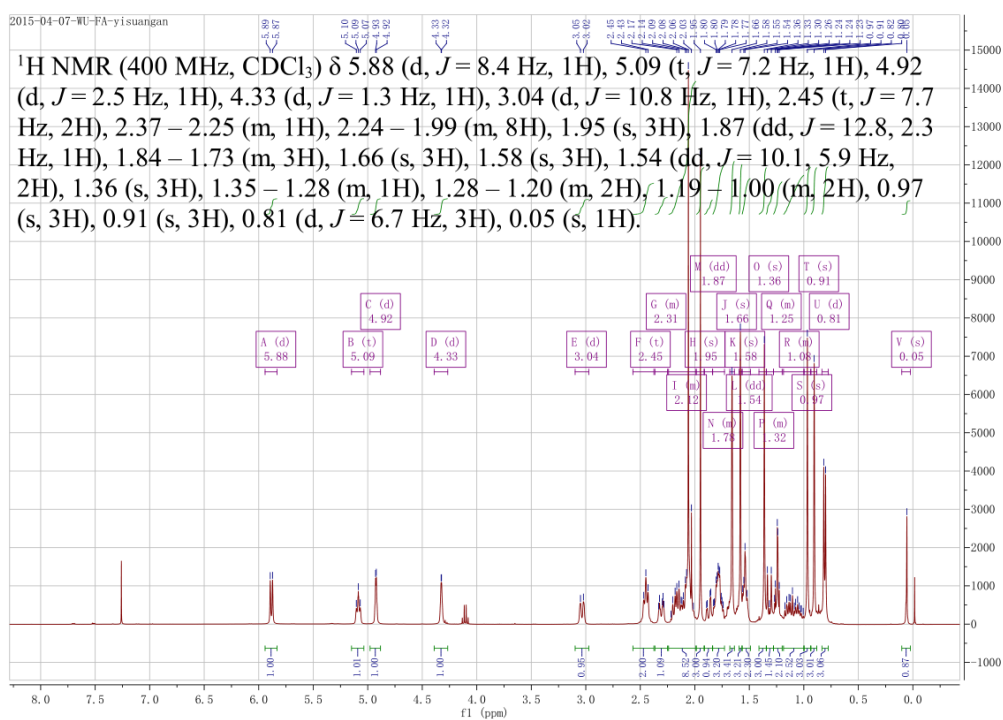

$^1\text{H}$  NMR of compound FA-1

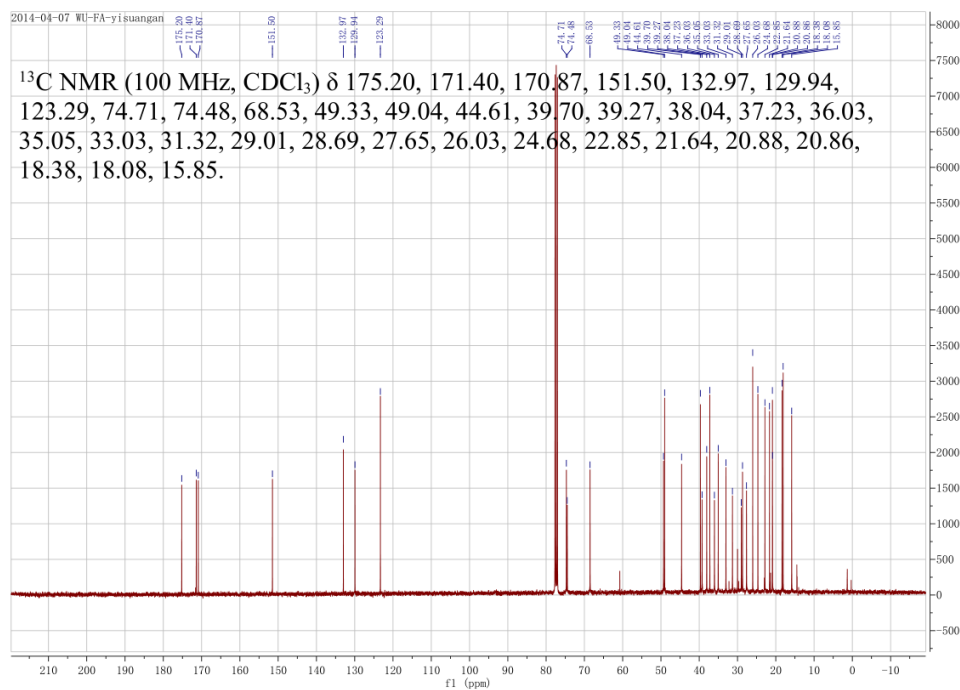

$^{13}\text{C}$  NMR of compound FA-1

Sample Name 150326-07-2  
Comment

Instrument maXis impact

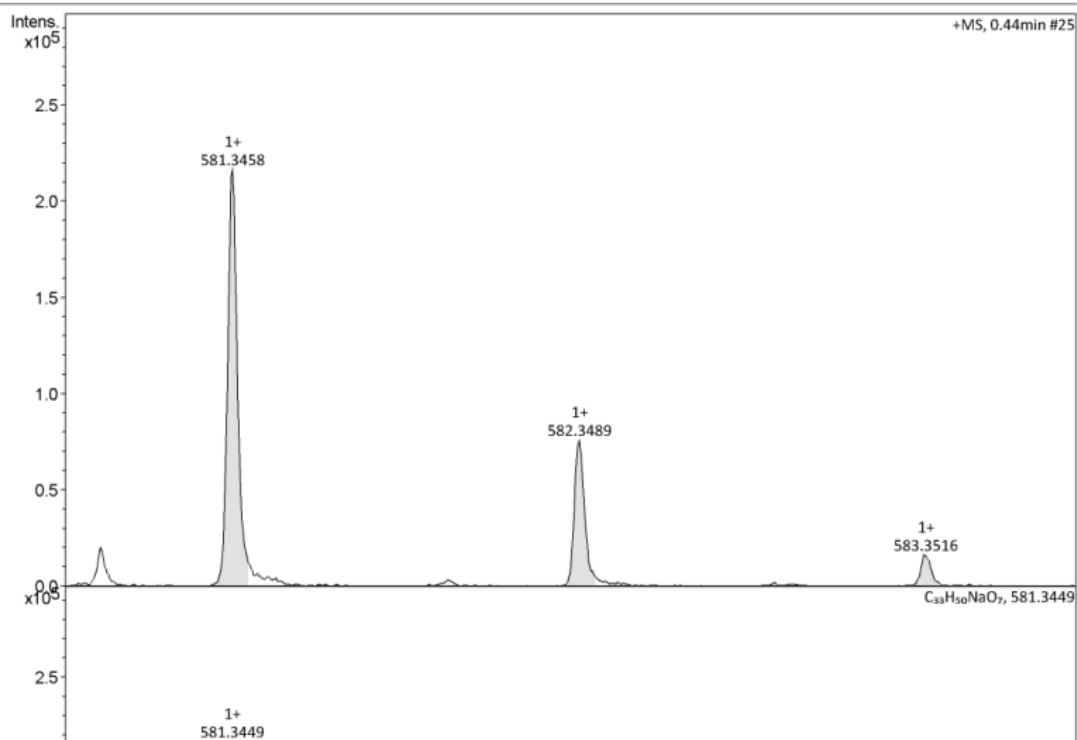

HRMS of compound FA-1

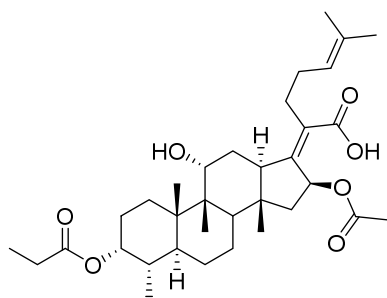

Structure of FA-2

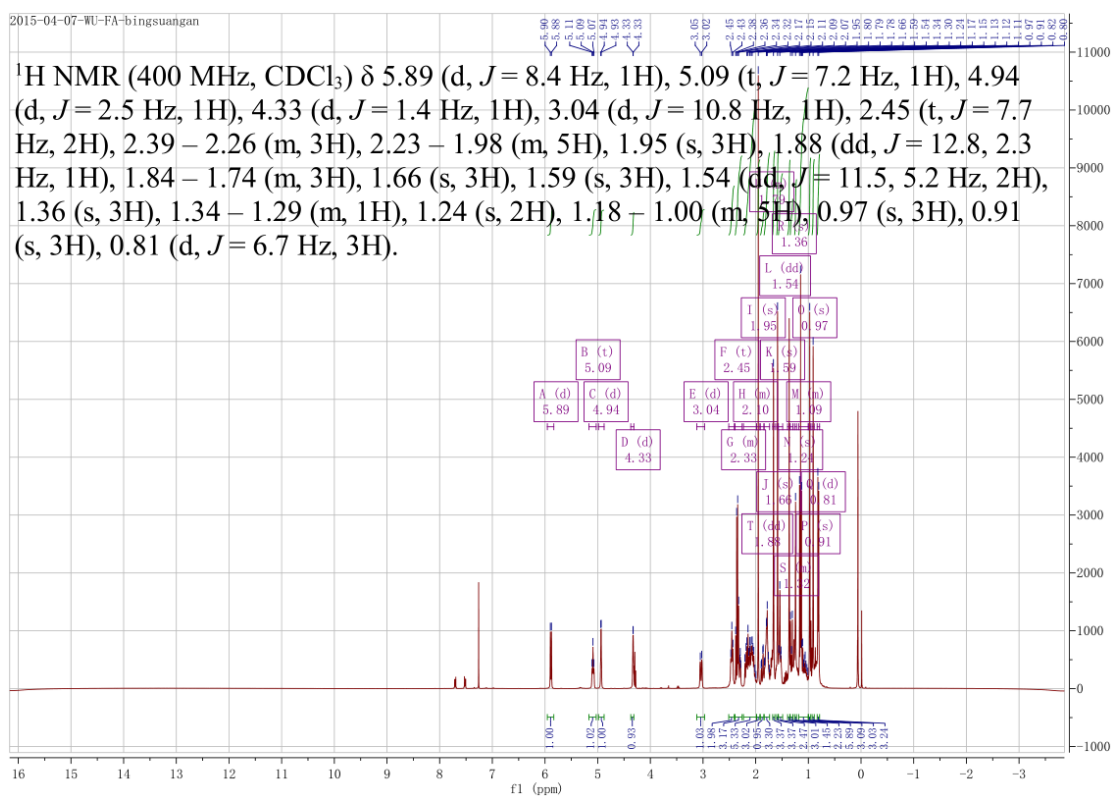

$^1\text{H}$  NMR of compound FA-2

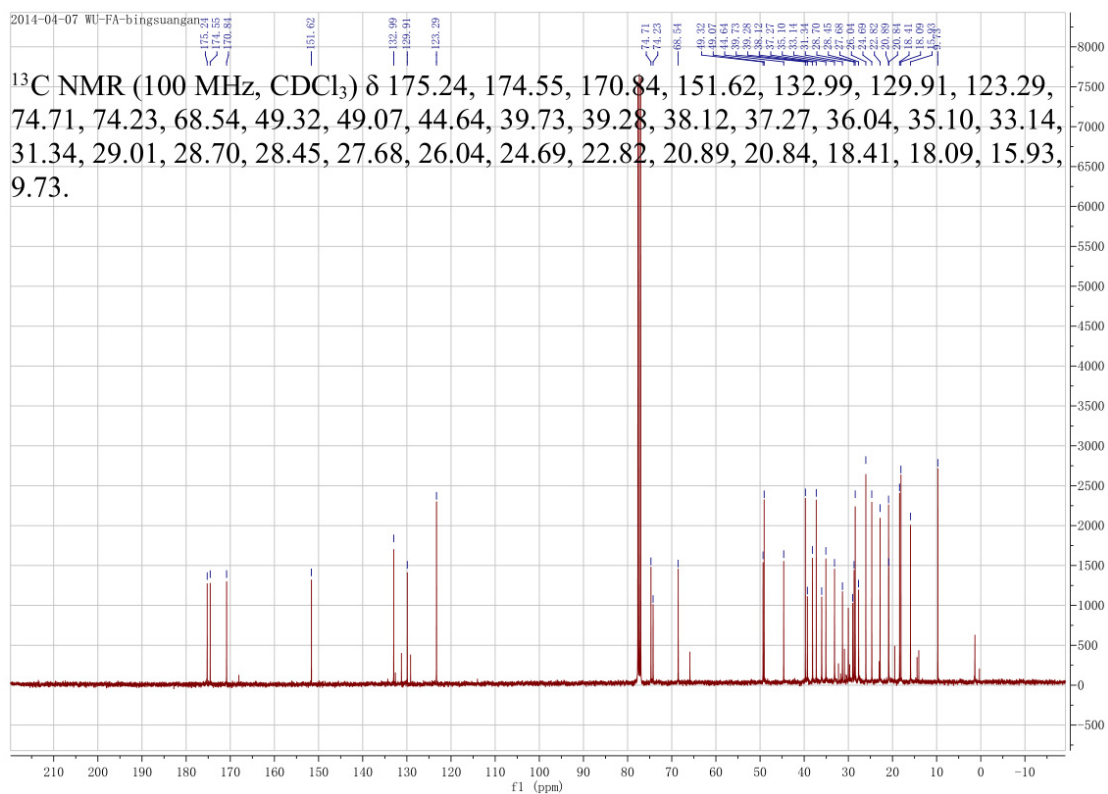

$^{13}\text{C}$  NMR of compound FA-2

Sample Name 150326-07-3  
Comment

Instrument maXis impact

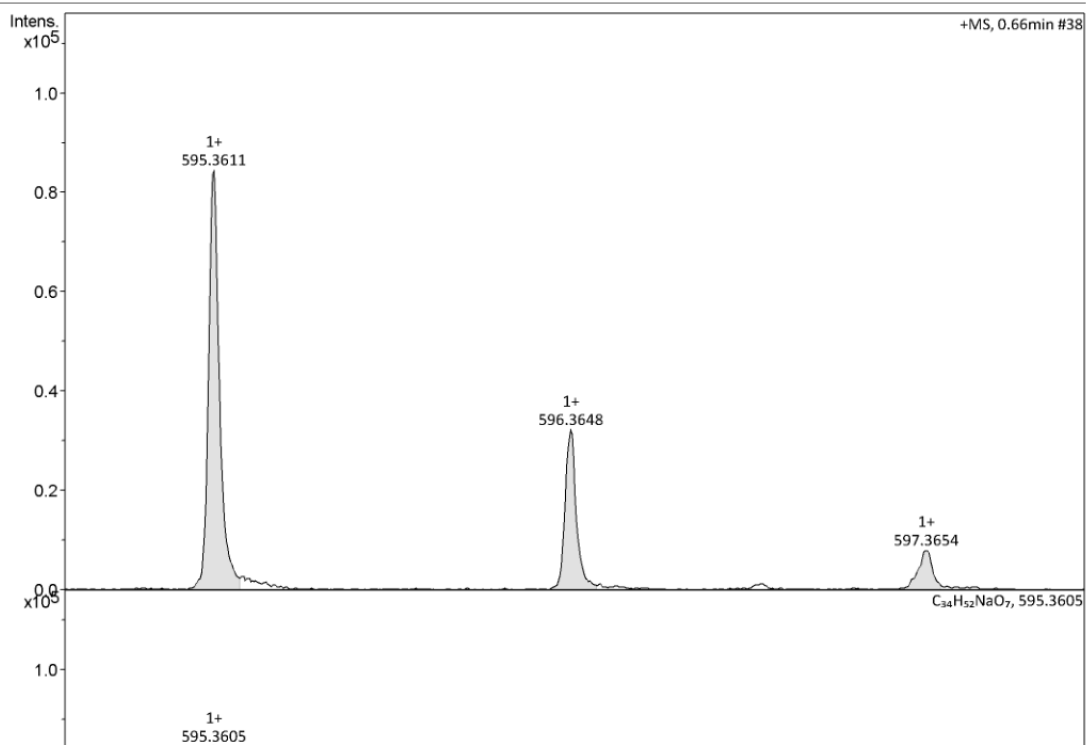

HRMS of compound FA-2



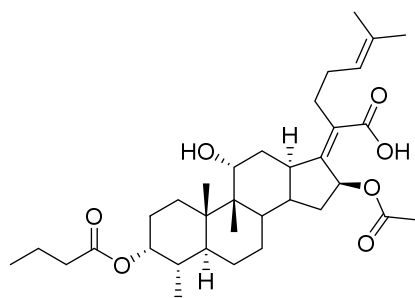

Structure of FA-3

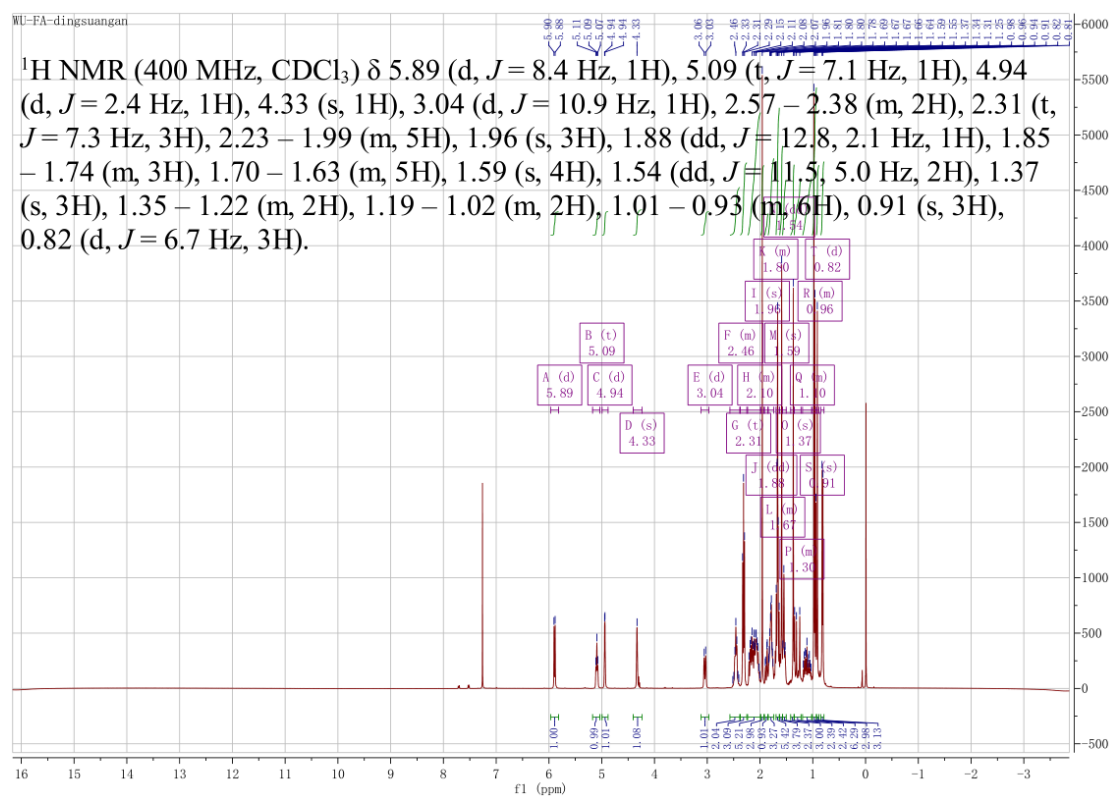

$^1\text{H}$  NMR of compound FA-3

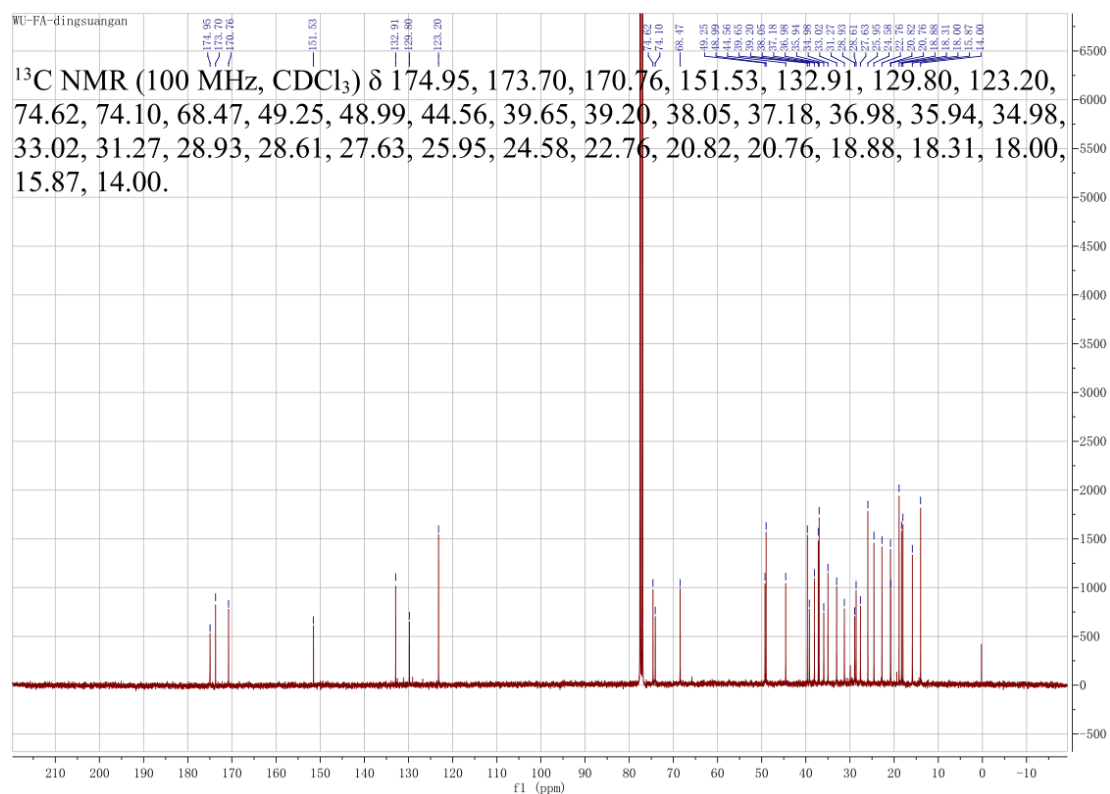

$^{13}\text{C}$  NMR of compound FA-3

Sample Name 150326-07-4  
Comment

Instrument maXis impact

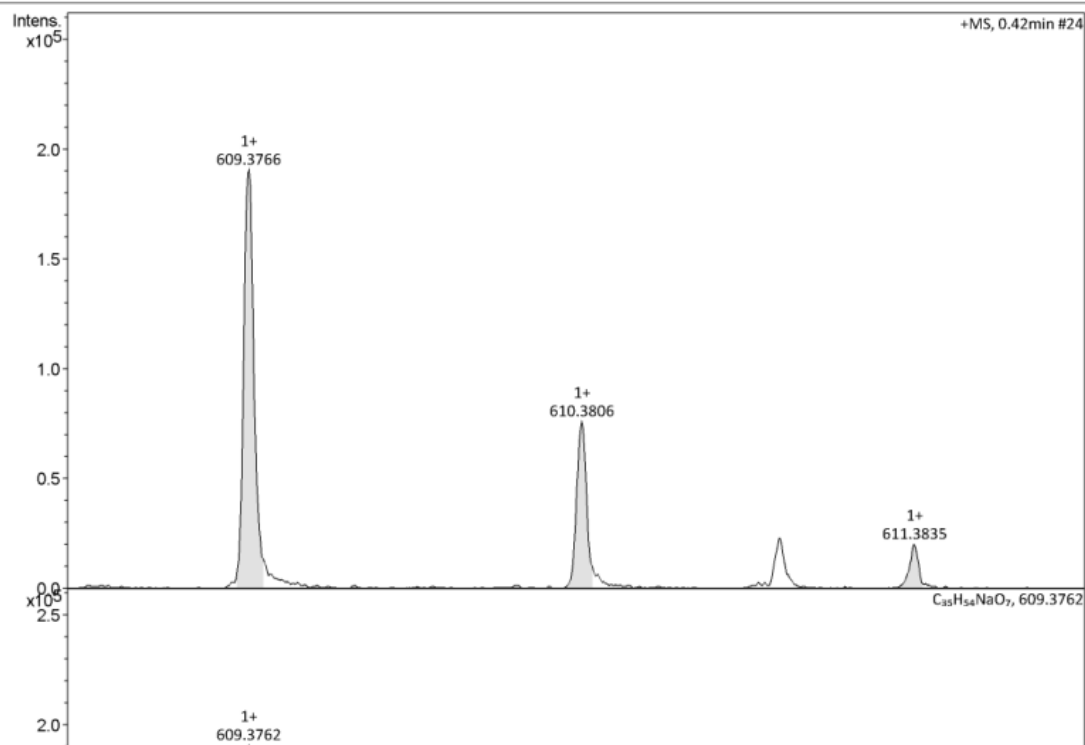

HRMS of compound FA-3

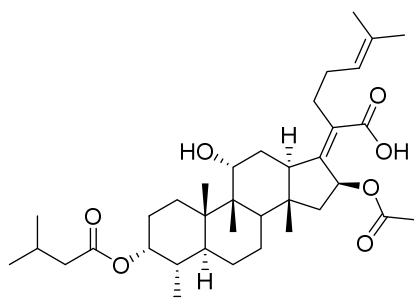

Structure of FA-4

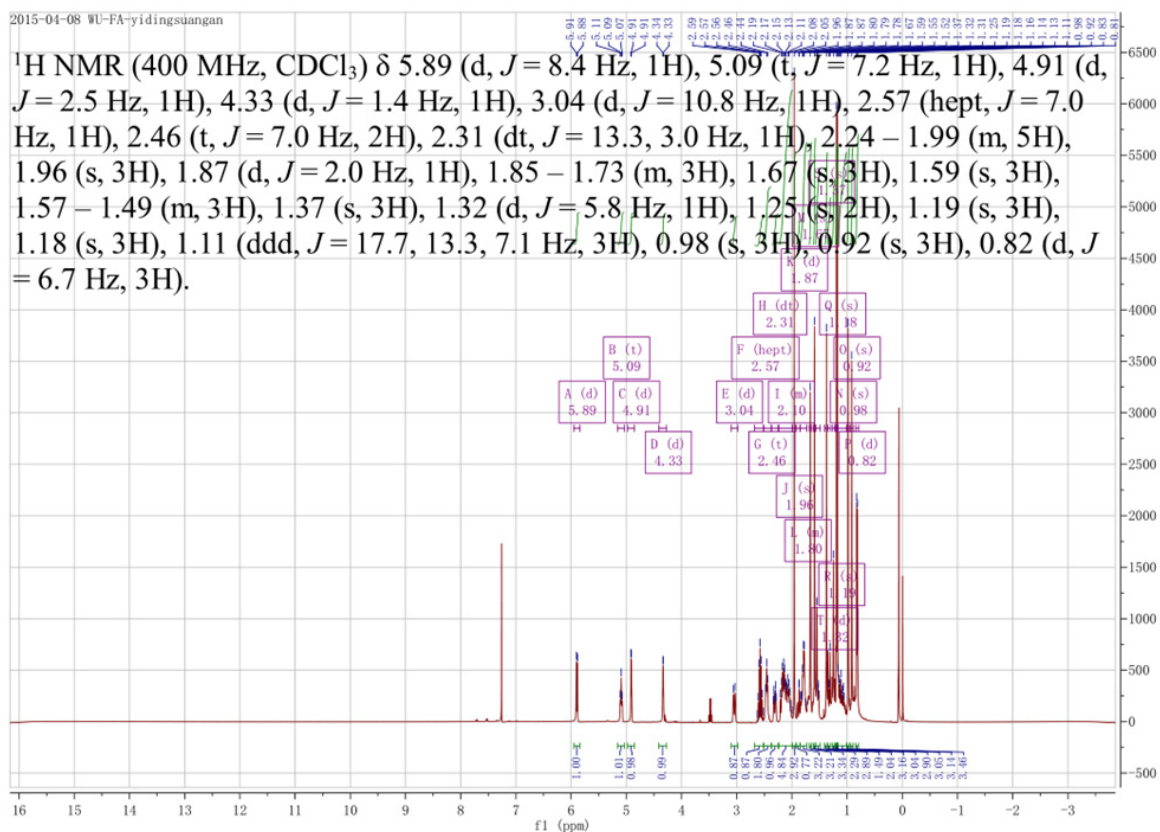

$^1\text{H}$  NMR of compound FA-4

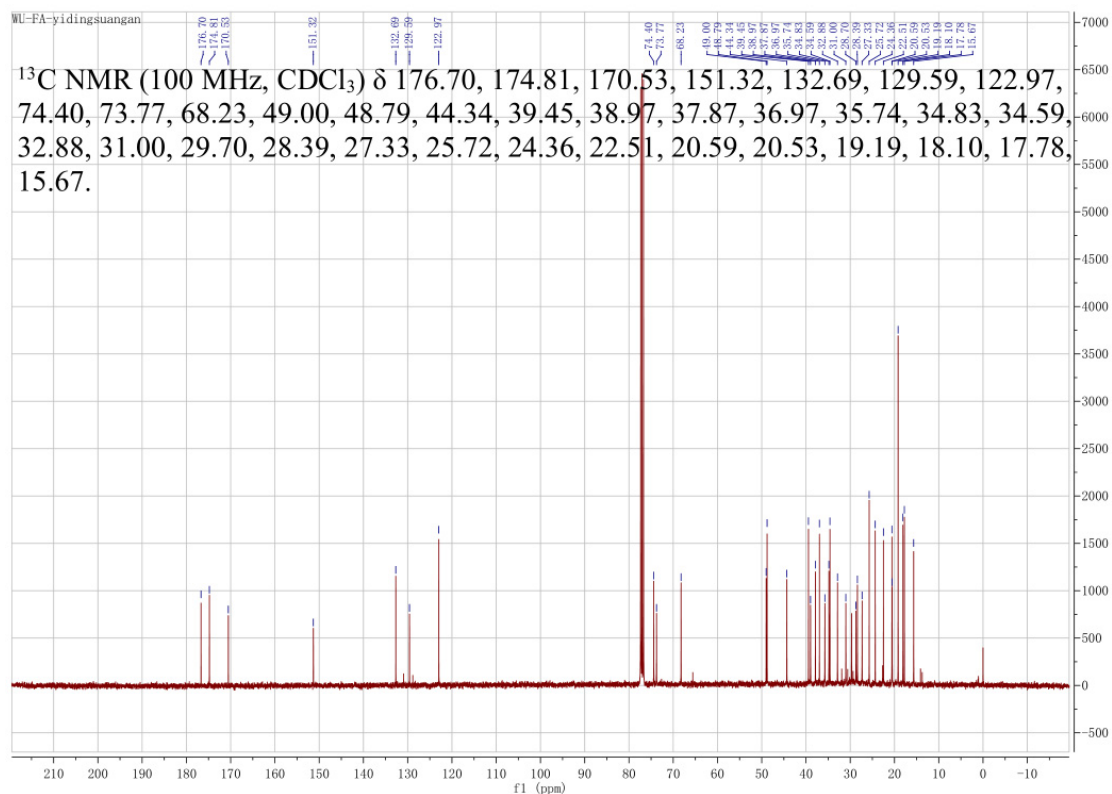

$^{13}\text{C}$  NMR of compound FA-4

Sample Name 150326-07-5  
Comment

Instrument maXis impact

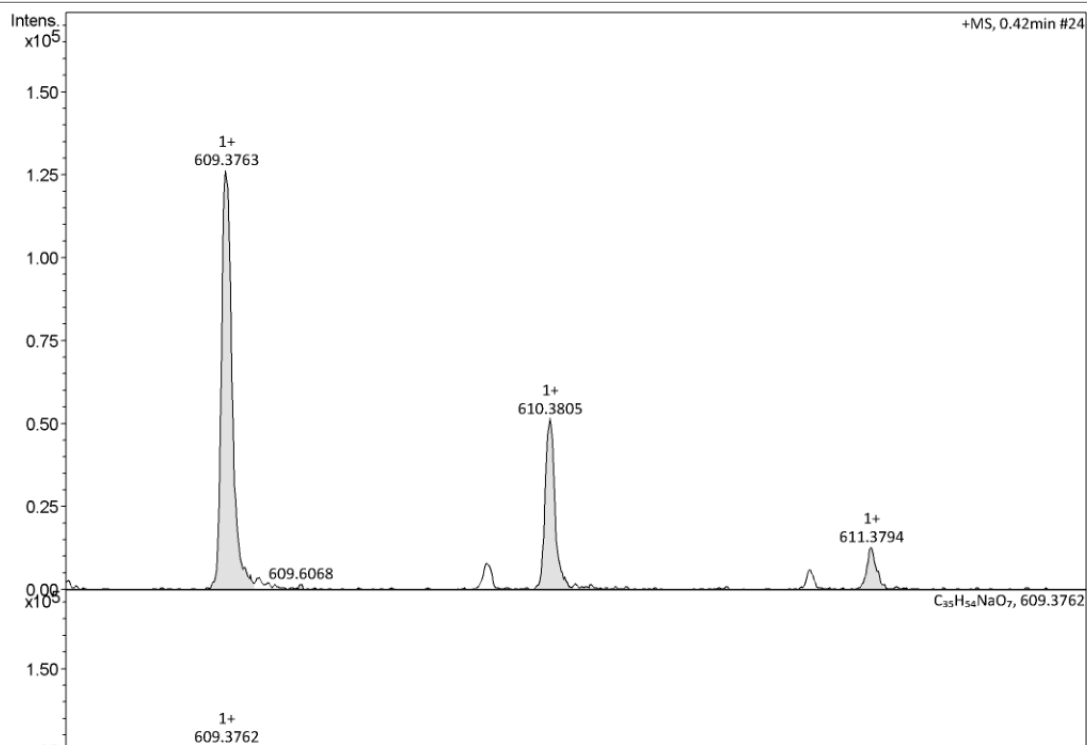

HRMS of compound FA-4

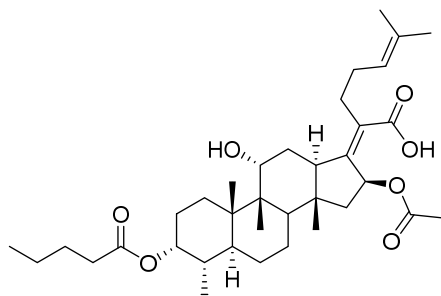

Structure of FA-5

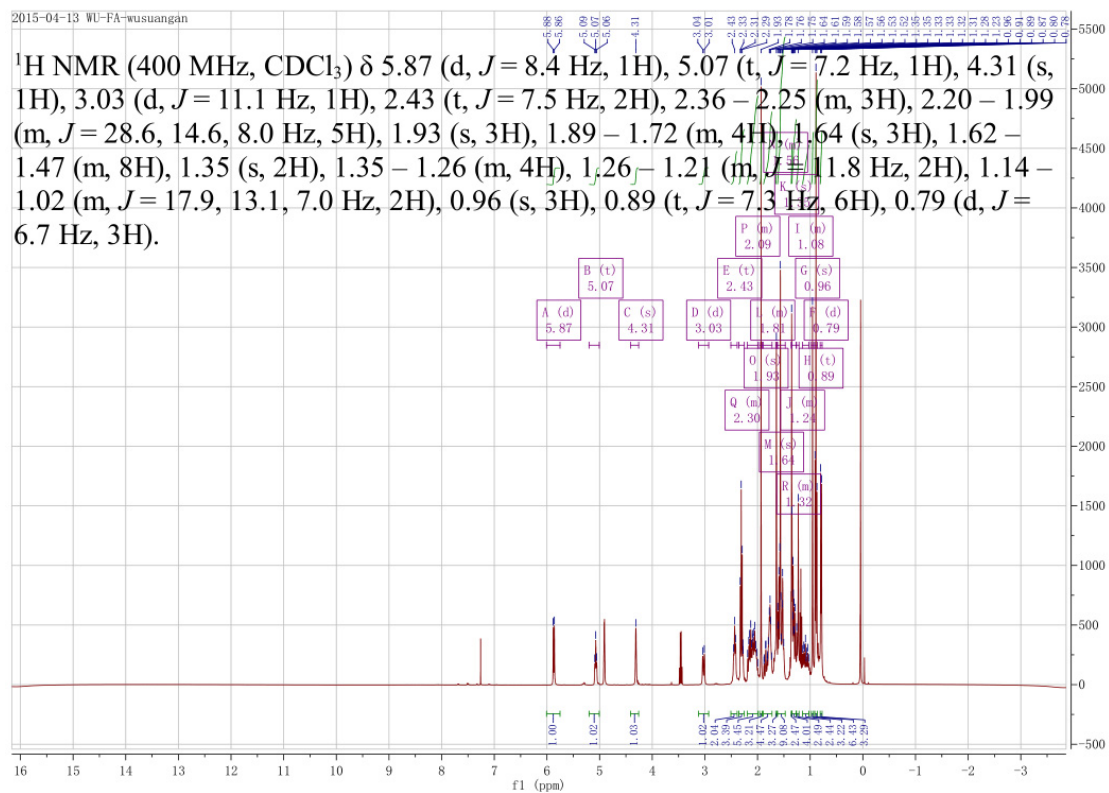

$^1\text{H}$  NMR of compound FA-5

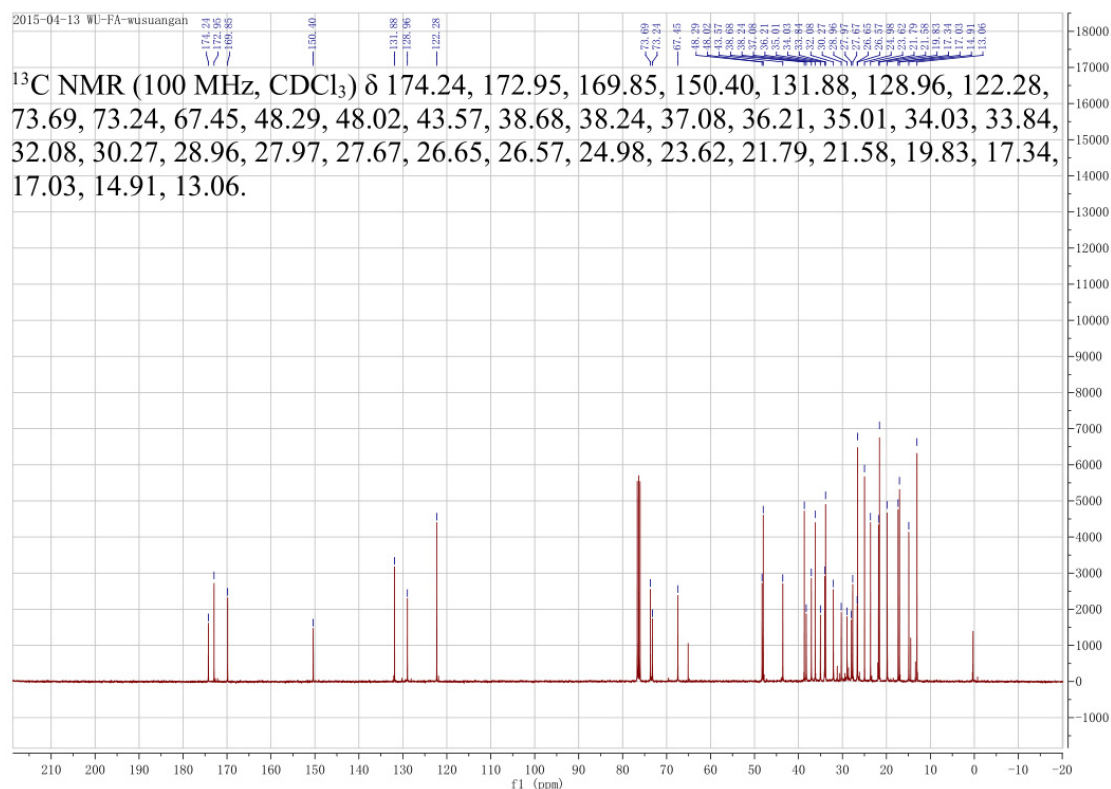

$^{13}\text{C}$  NMR of compound FA-5

FA\_5 #2846 RT: 16.28 AV: 1 NL: 2.79E6  
T: FTMS + p ESI Full ms [150.0000-2000.0000]

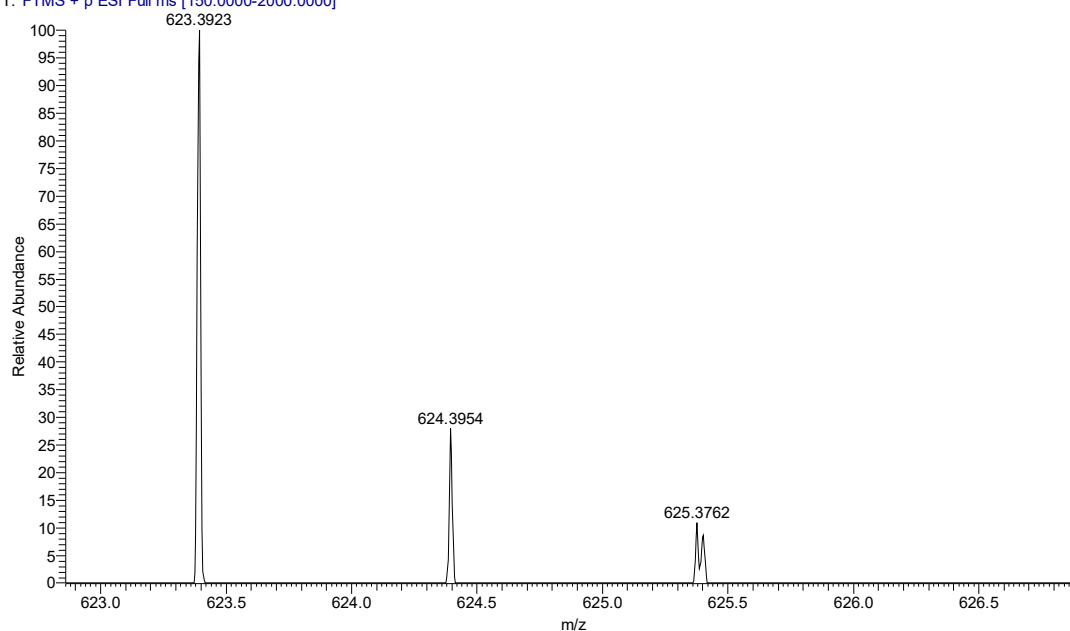

HRMS of compound FA-5

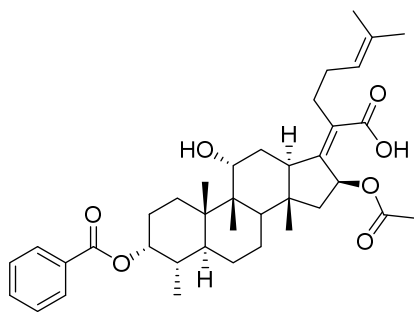

Structure of FA-6

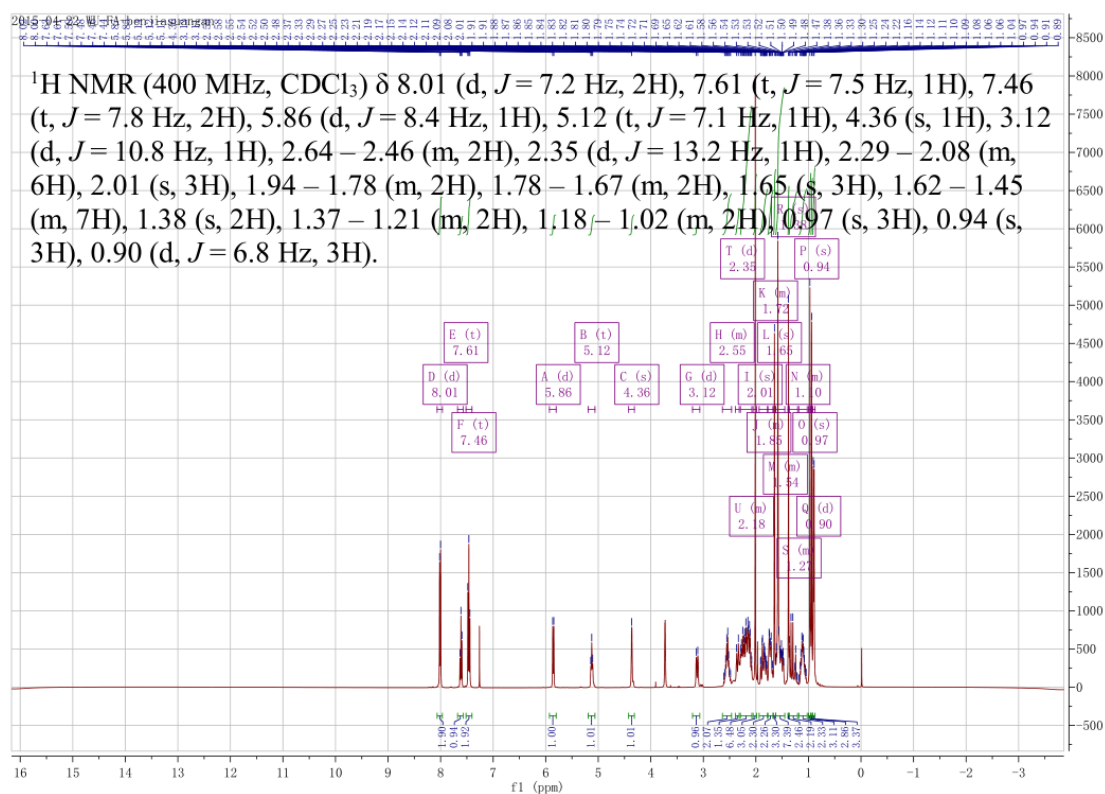

<sup>1</sup>H NMR of compound FA-6

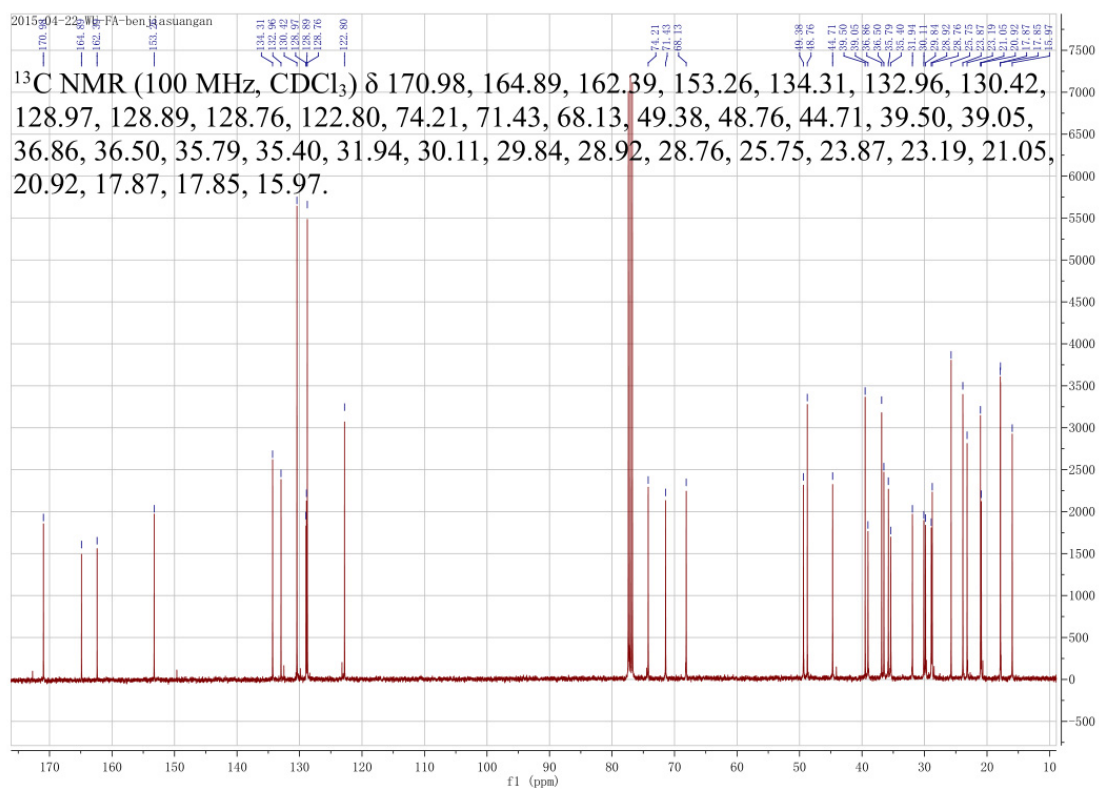

$^{13}\text{C}$  NMR of compound FA-6

FA\_6 #2910 RT: 16.65 AV: 1 NL: 3.11E7  
T: FTMS + p ESI Full ms [150.0000-2000.0000]

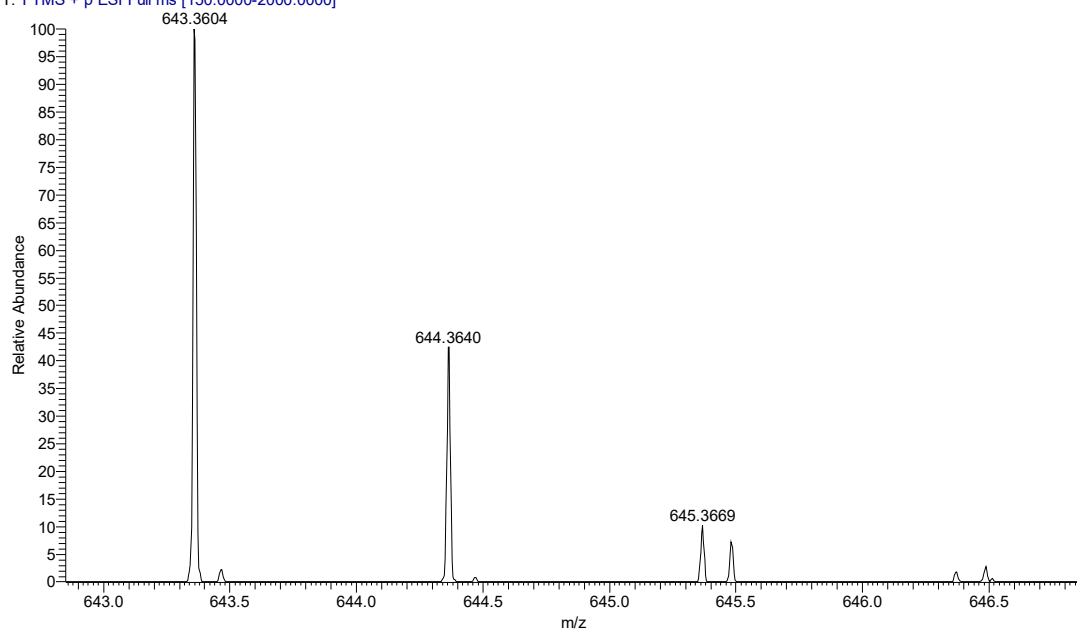

HRMS of compound FA-6



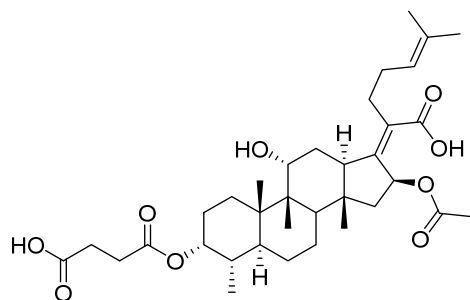

Structure of FA-7

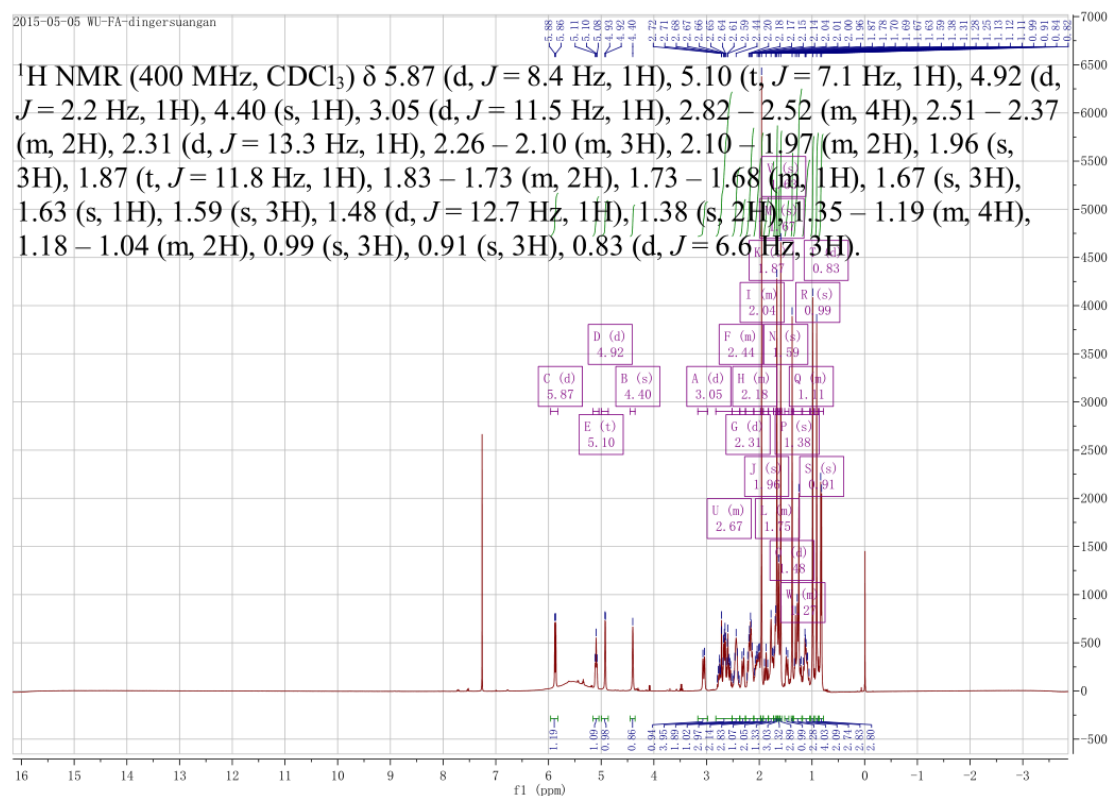

$^1\text{H}$  NMR of compound FA-7

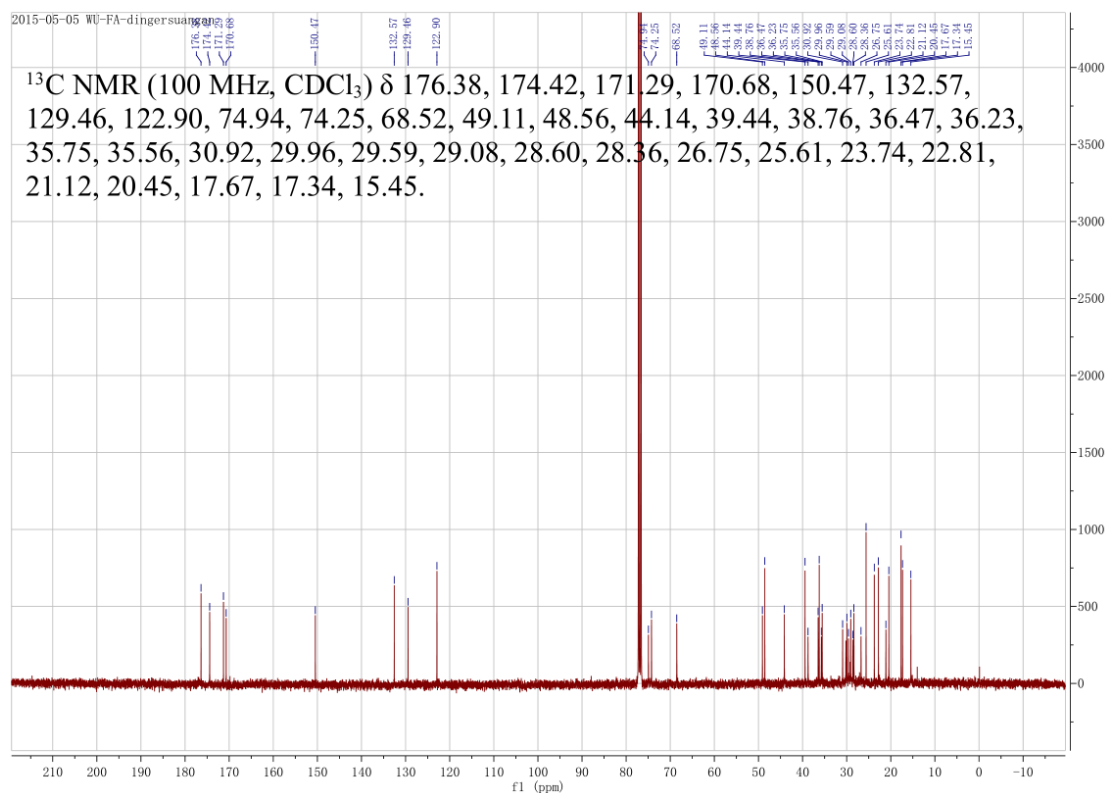

$^{13}\text{C}$  NMR of compound FA-7

FA\_7 #2541 RT: 14.70 AV: 1 NL: 4.58E6  
T: FTMS + p ESI Full ms [150.0000-2000.0000]

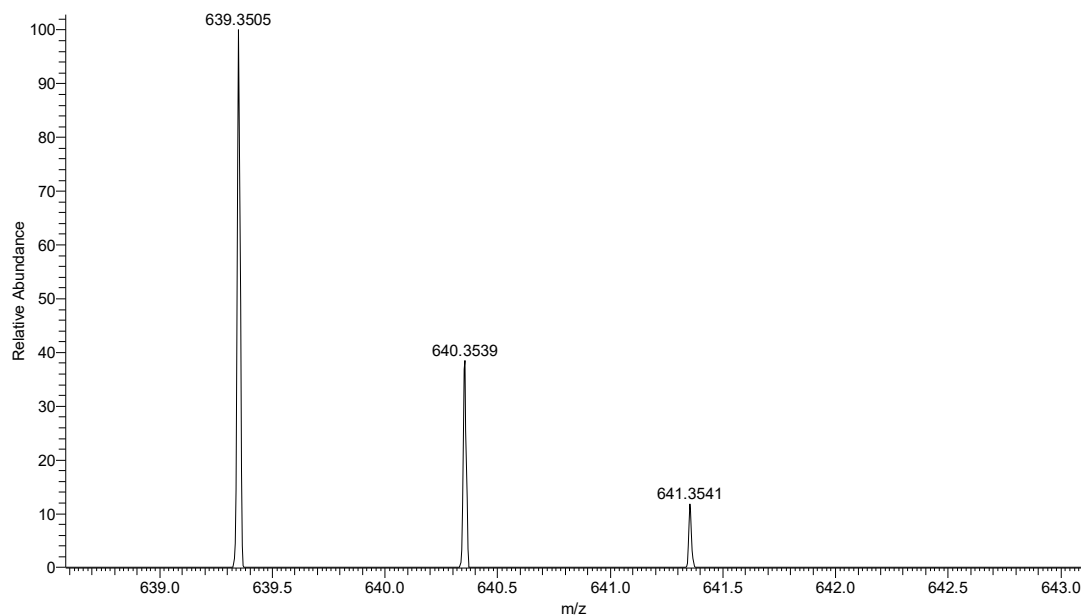

HRMS of compound FA-7

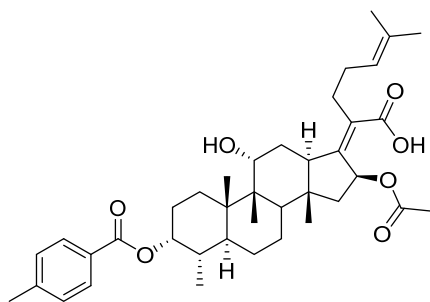

Structure of FA-8

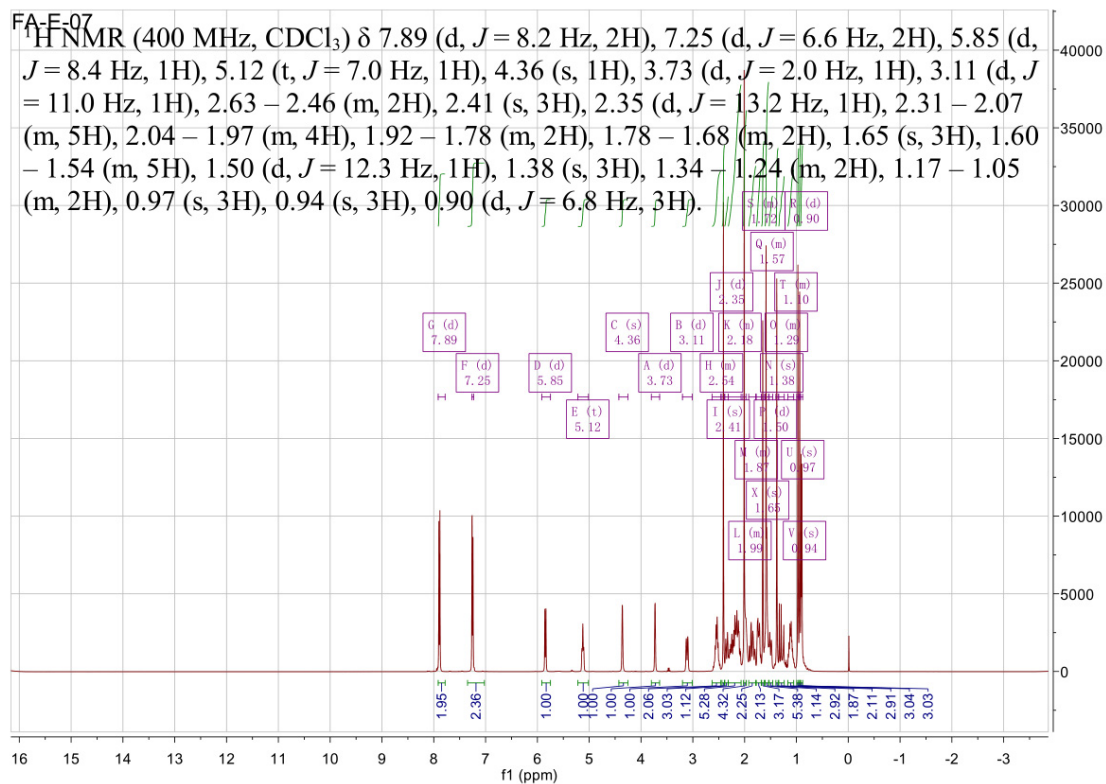

$^1\text{H}$  NMR of compound FA-8

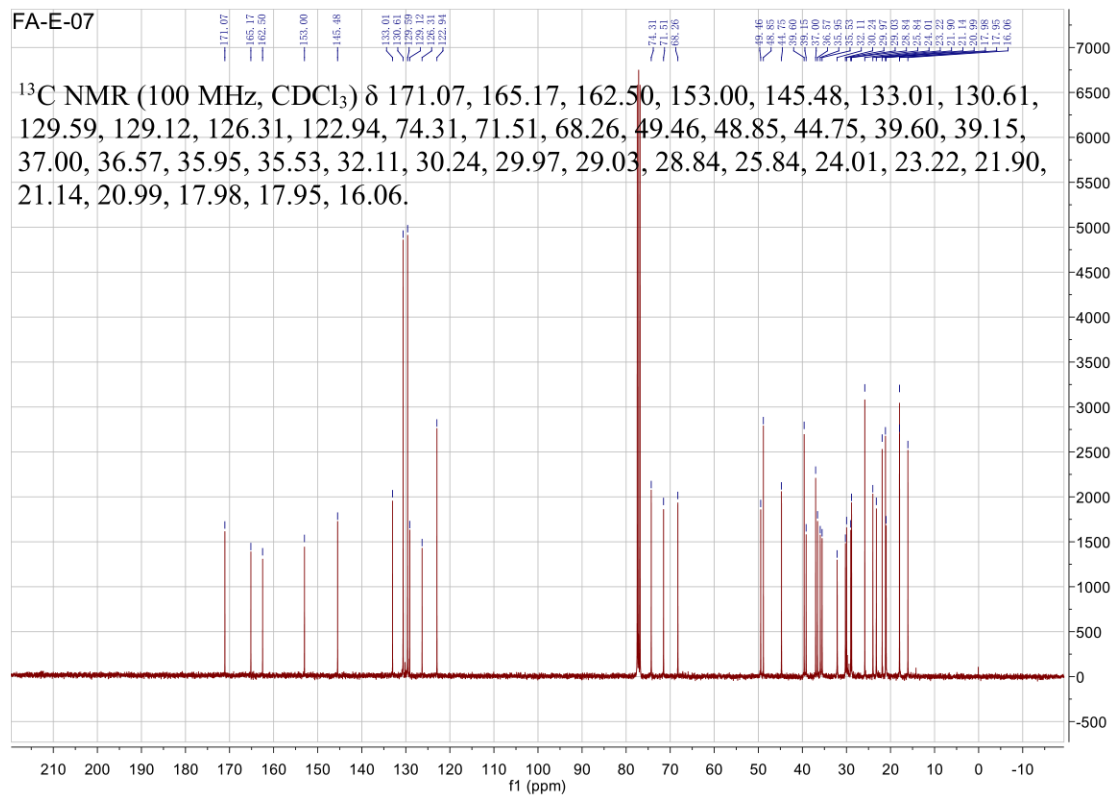

### $^{13}\text{C}$ NMR of compound FA-8

Sample Name 17032203-3  
Comment

Instrument maXis impact

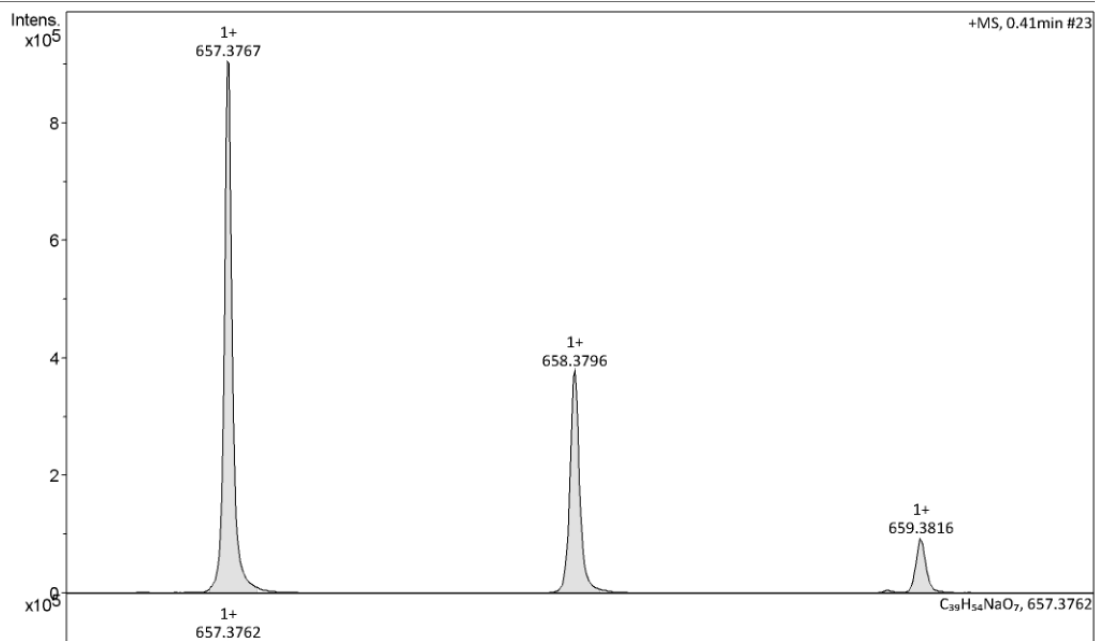

### HRMS of compound FA-8

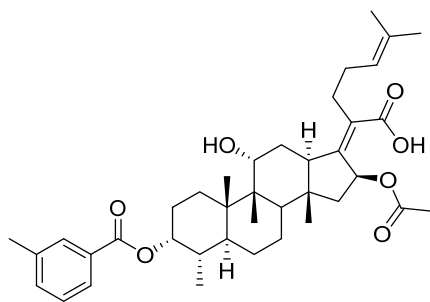

Structure of FA-9

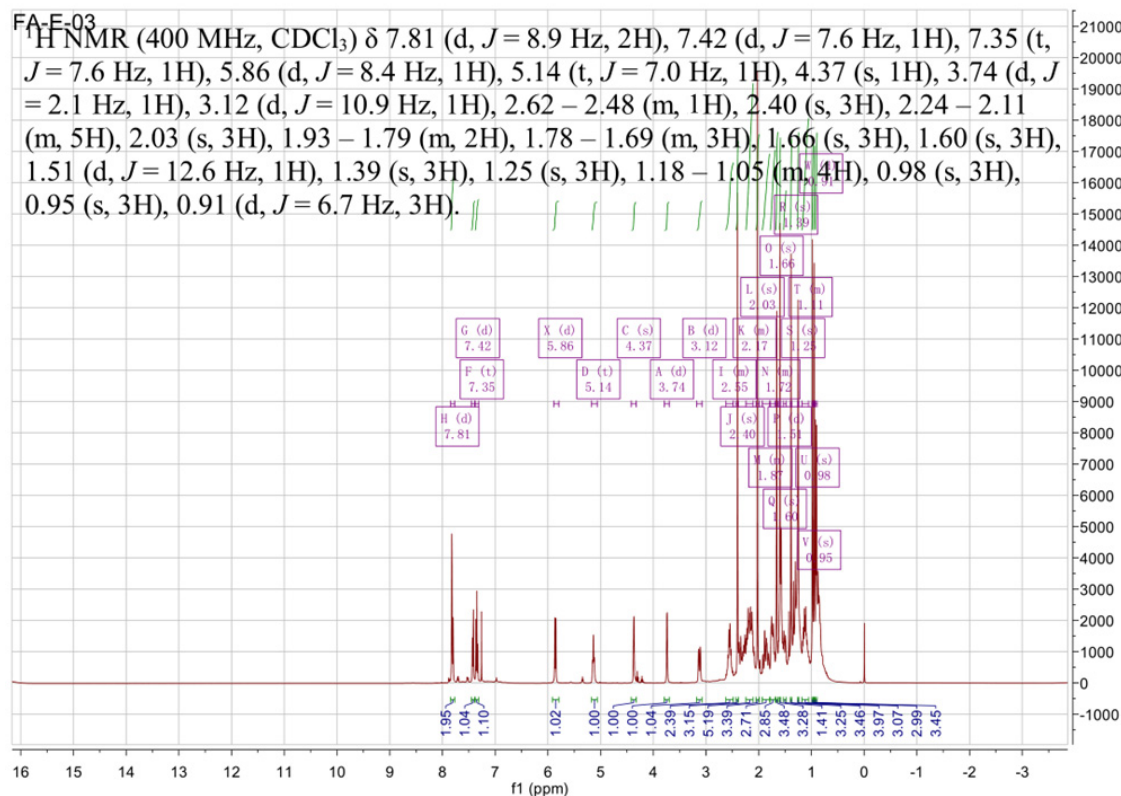

$^1\text{H}$  NMR of compound FA-9

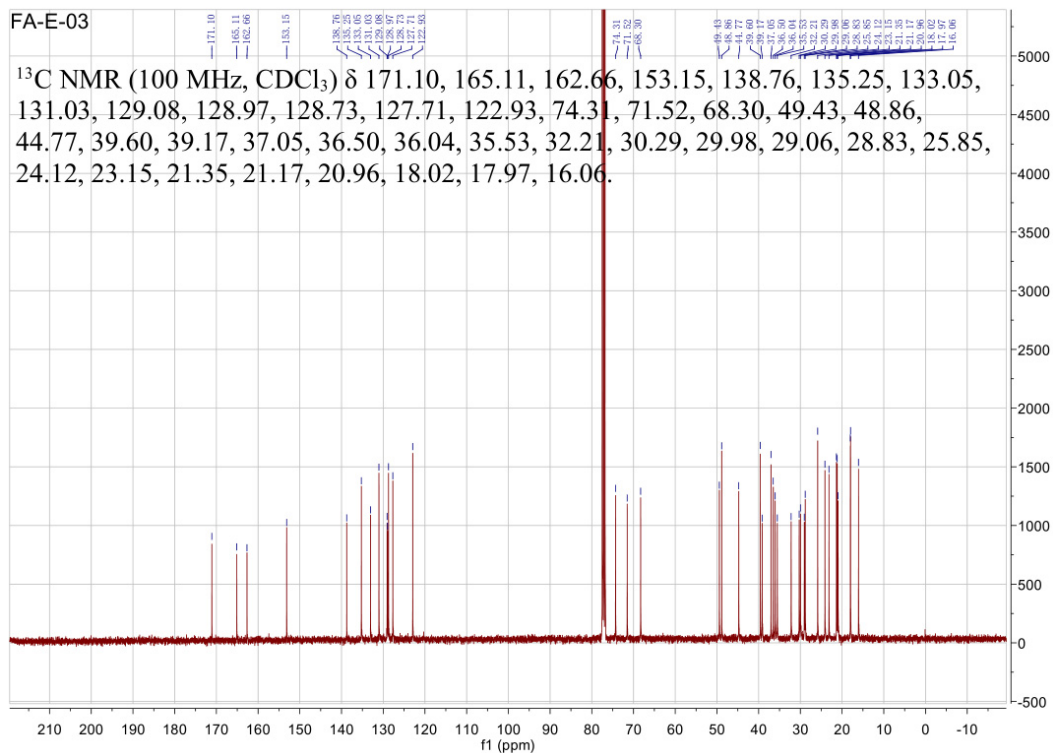

$^{13}\text{C}$  NMR of compound FA-9

Sample Name 17032203-1  
Comment

Instrument maXis impact

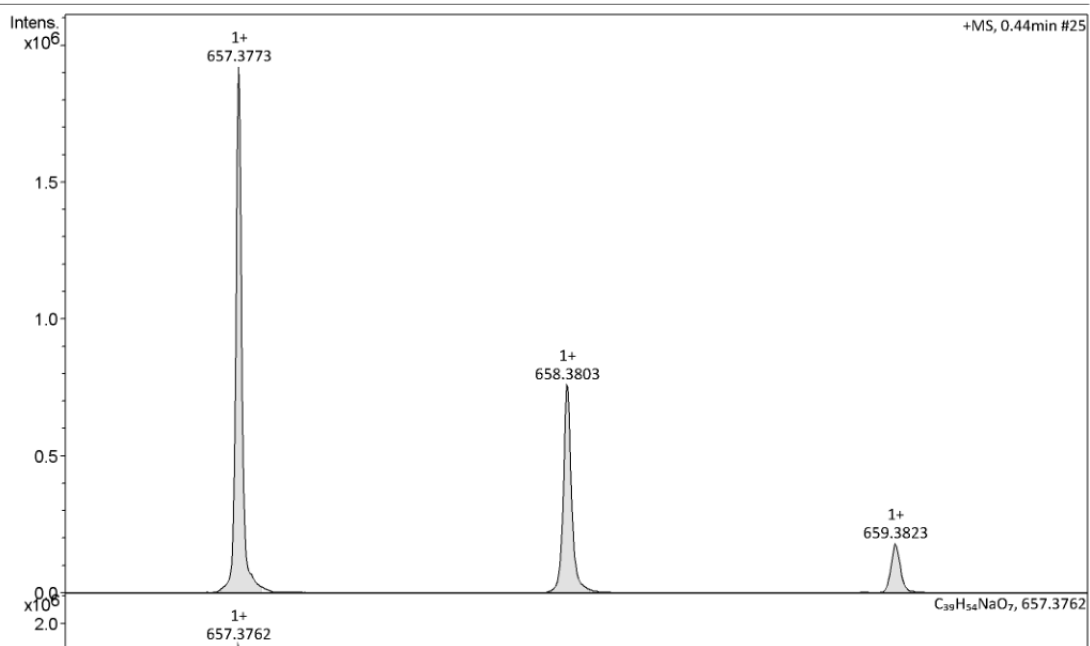

HRMS of compound FA-9

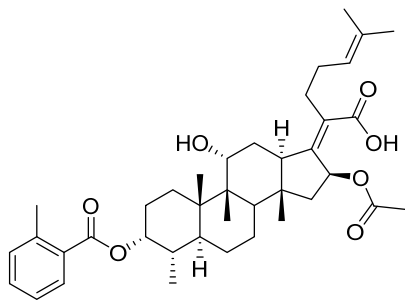

Structure of FA-10

FA-E-15

$^1\text{H}$  NMR (400 MHz,  $\text{CDCl}_3$ )  $\delta$  7.87 (d,  $J = 7.8$  Hz, 1H), 7.53 – 7.39 (m, 1H), 7.27 (dd,  $J = 12.9, 6.0$  Hz, 2H), 5.86 (d,  $J = 8.4$  Hz, 1H), 5.13 (t,  $J = 6.7$  Hz, 1H), 4.37 (s, 1H), 3.75 (d,  $J = 1.7$  Hz, 1H), 3.12 (d,  $J = 11.2$  Hz, 1H), 2.63 (d,  $J = 6.2$  Hz, 3H), 2.61 – 2.49 (m, 2H), 2.36 (d,  $J = 13.0$  Hz, 1H), 2.31 – 2.08 (m, 5H), 2.03 (s, 3H), 1.93 – 1.81 (m, 3H), 1.79 – 1.70 (m, 2H), 1.66 (s, 3H), 1.59 (d,  $J = 7.4$  Hz, 5H), 1.51 (d,  $J = 12.2$  Hz, 1H), 1.39 (s, 3H), 1.35 – 1.24 (m, 2H), 1.20 – 1.06 (m, 2H), 0.97 (d,  $J = 7.0$  Hz, 3H), 0.95 (s, 3H), 0.92 (d,  $J = 6.7$  Hz, 3H).

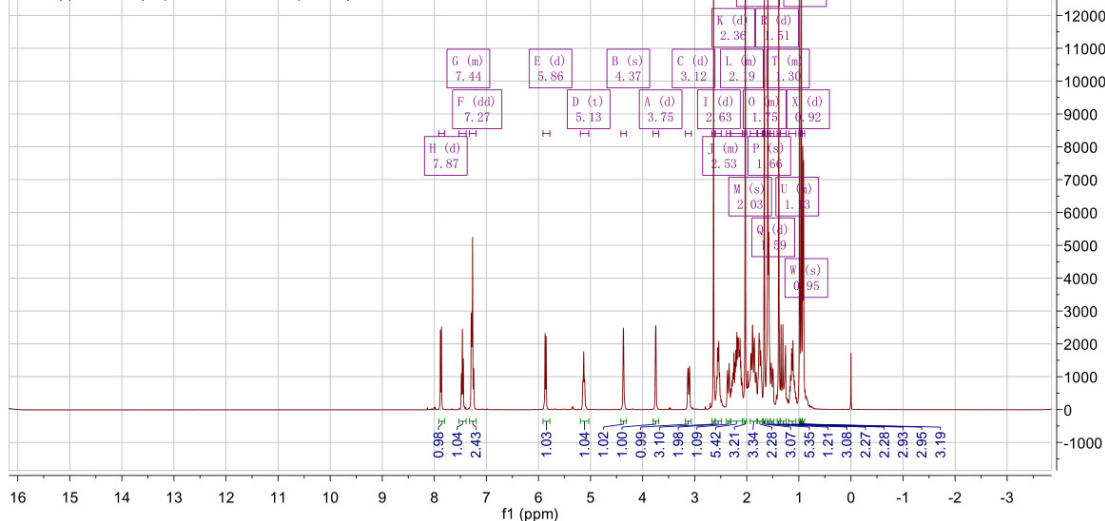

$^1\text{H}$  NMR of compound FA-10

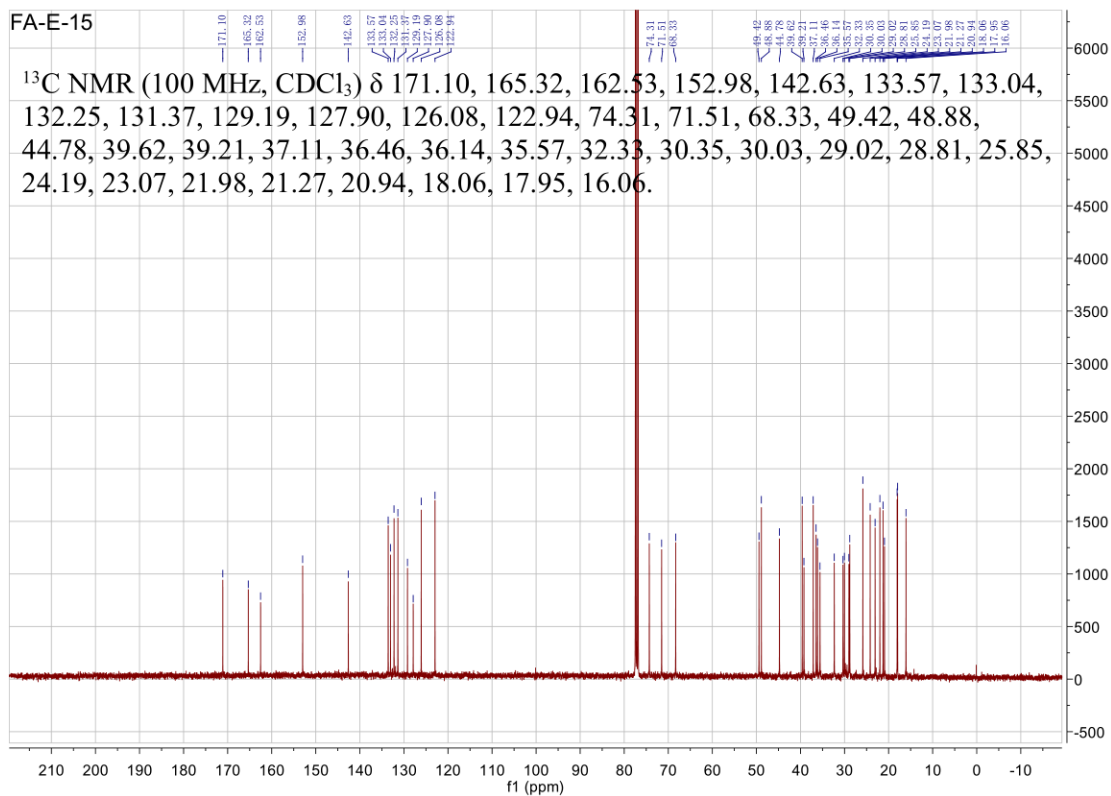

$^{13}\text{C}$  NMR of compound FA-10

Sample Name 17032203-9  
Comment

Instrument maXis impact

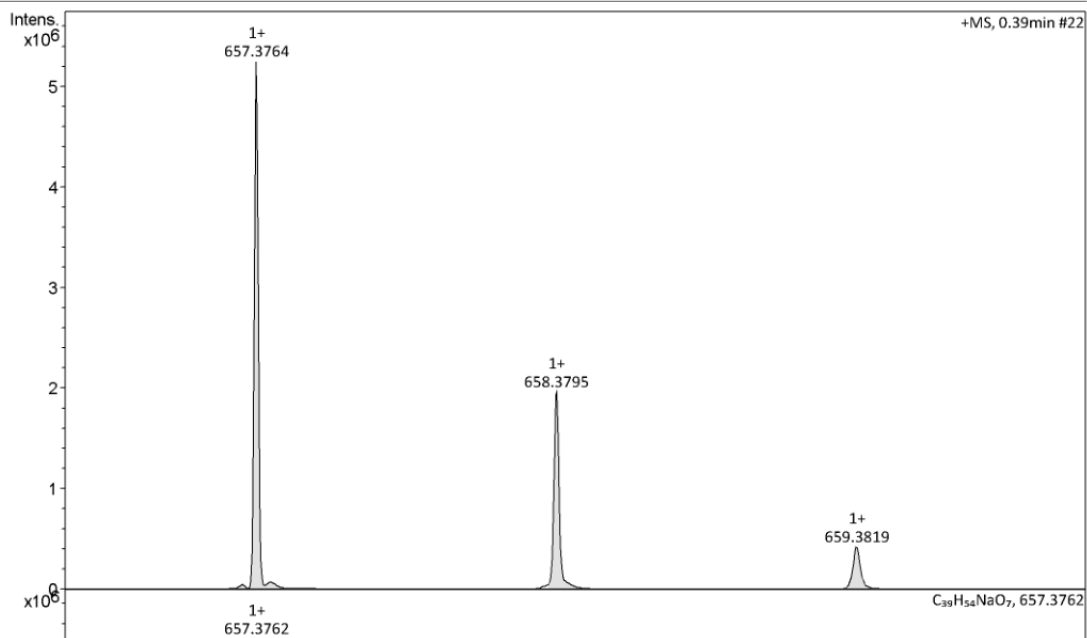

HRMS of compound FA-10



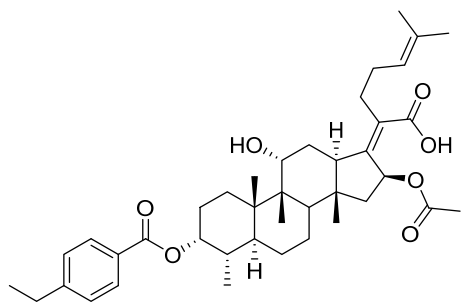

Structure of FA-11

FA-E-08

$^1\text{H}$  NMR (400 MHz,  $\text{CDCl}_3$ )  $\delta$  7.92 (d,  $J = 8.2$  Hz, 2H), 7.28 (d,  $J = 8.1$  Hz, 2H), 5.85 (d,  $J = 8.4$  Hz, 1H), 5.13 (t,  $J = 6.9$  Hz, 1H), 4.37 (s, 1H), 3.74 (d,  $J = 2.1$  Hz, 1H), 3.11 (d,  $J = 11.0$  Hz, 1H), 2.71 (q,  $J = 7.6$  Hz, 2H), 2.65 – 2.47 (m, 2H), 2.35 (d,  $J = 13.1$  Hz, 1H), 2.32 – 2.07 (m, 5H), 2.02 (s, 3H), 1.93 – 1.83 (m, 3H), 1.79 – 1.69 (m, 2H), 1.66 (s, 3H), 1.61 – 1.56 (m, 5H), 1.51 (d,  $J = 12.5$  Hz, 1H), 1.38 (s, 3H), 1.32 (d,  $J = 14.3$  Hz, 1H), 1.25 (t,  $J = 7.6$  Hz, 4H), 1.19 – 1.03 (m, 2H), 0.98 (s, 3H), 0.94 (s, 3H), 0.91 (d,  $J = 6.8$  Hz, 3H).

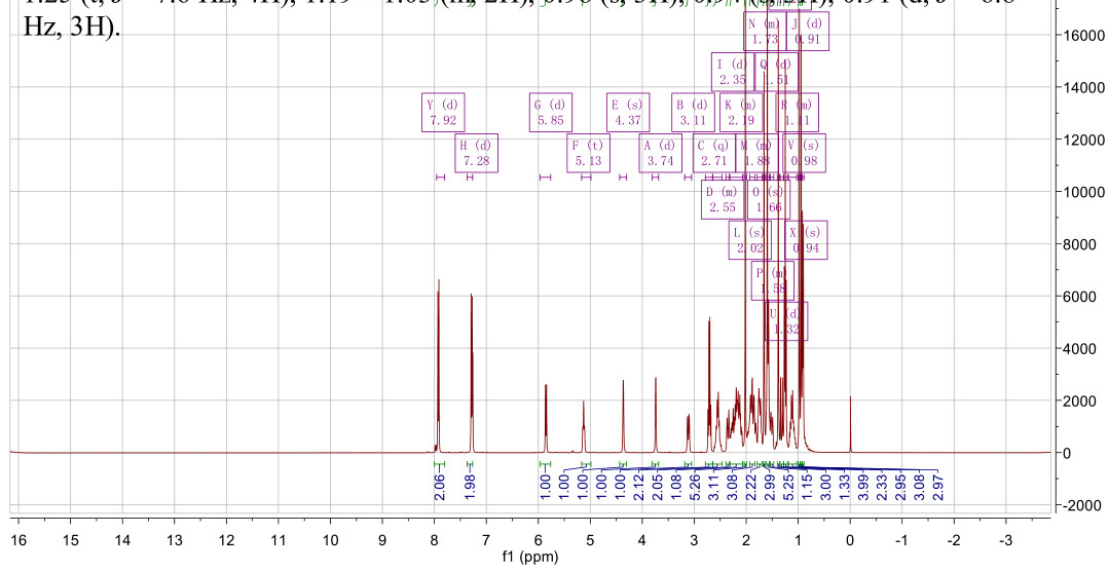

$^1\text{H}$  NMR of compound FA-11

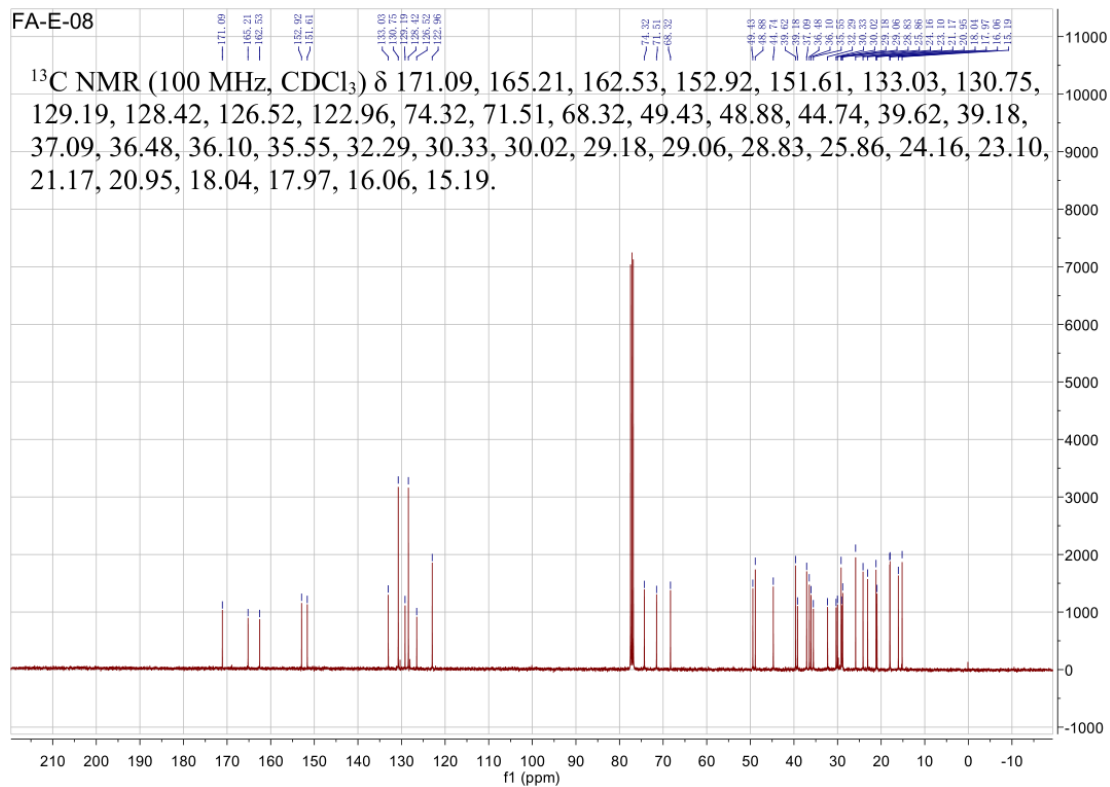

$^{13}\text{C}$  NMR of compound FA-11

Sample Name 17032203-4  
Comment

Instrument maXis impact

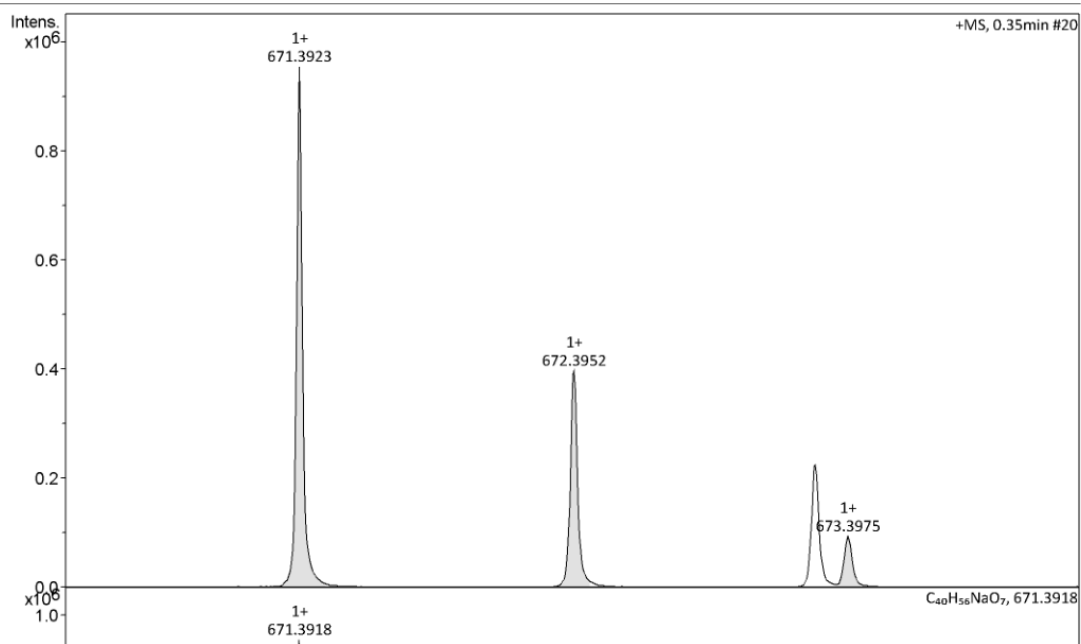

HRMS of compound FA-11

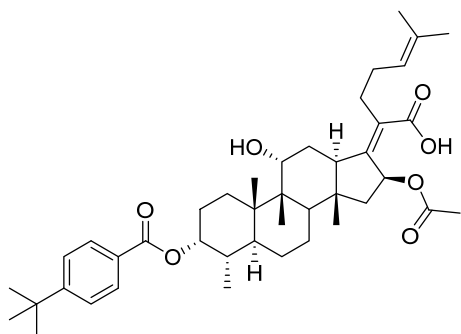

Structure of FA-12

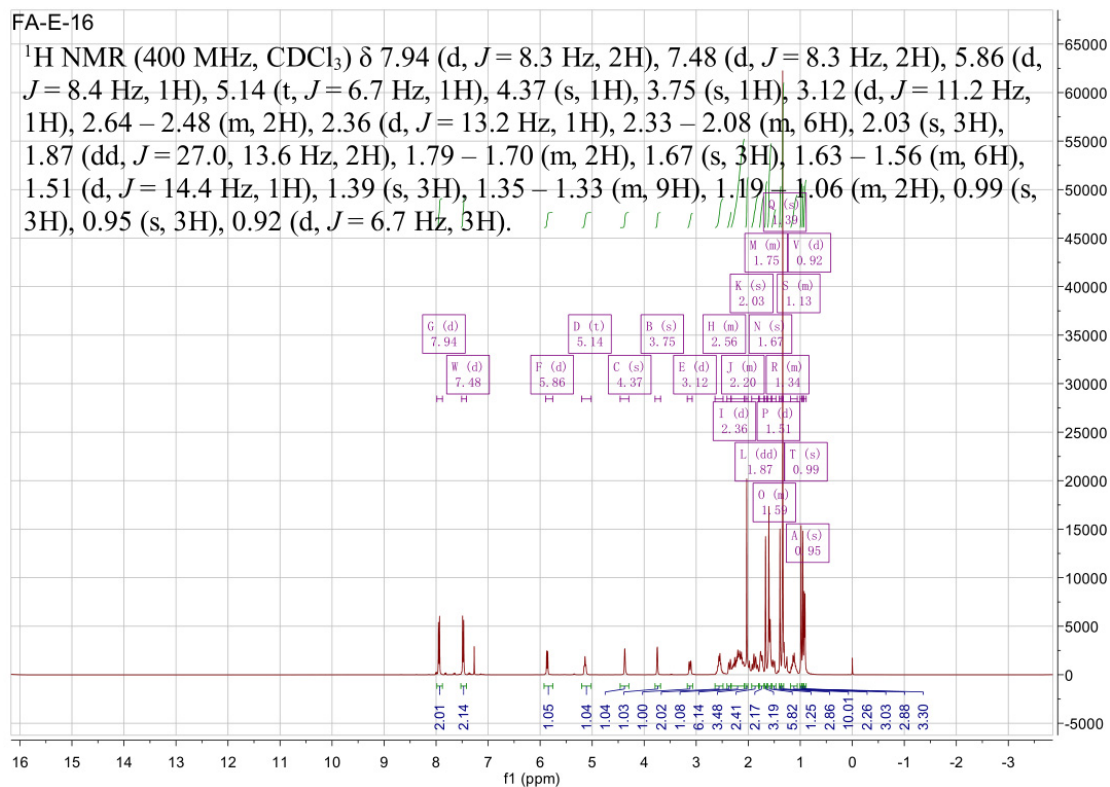

$^1\text{H}$  NMR of compound FA-12

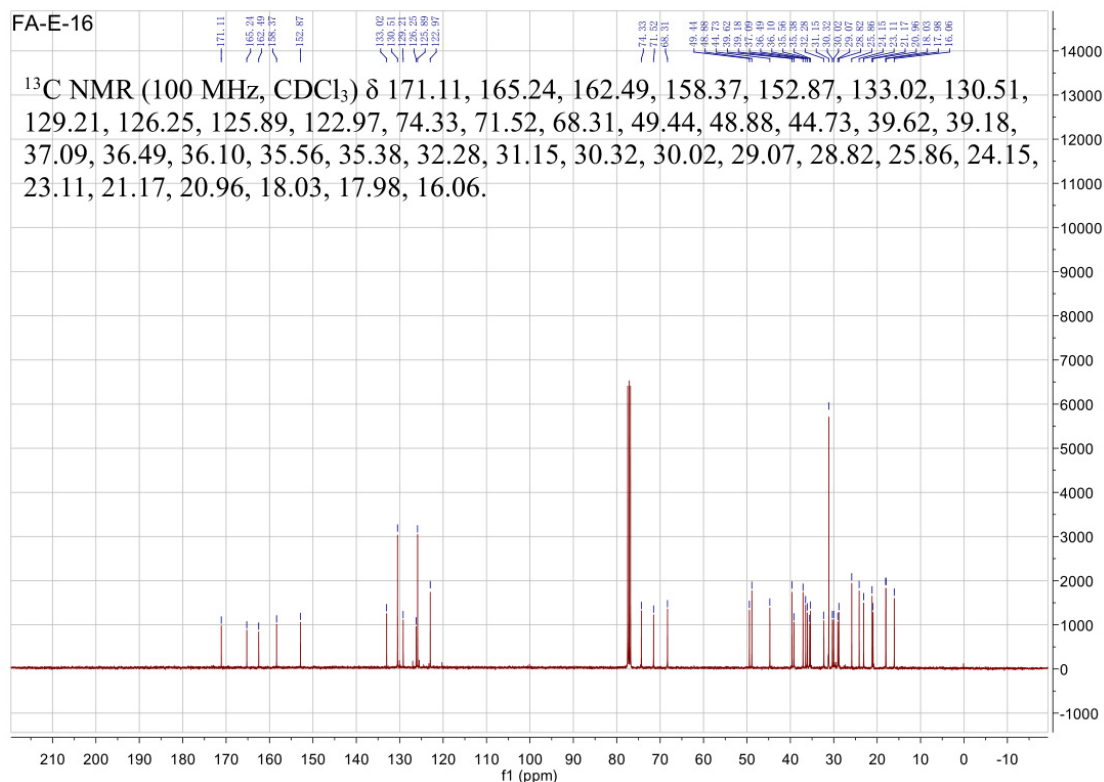

$^{13}\text{C}$  NMR of compound FA-12

Sample Name 17032203-10  
Comment

Instrument maXis impact

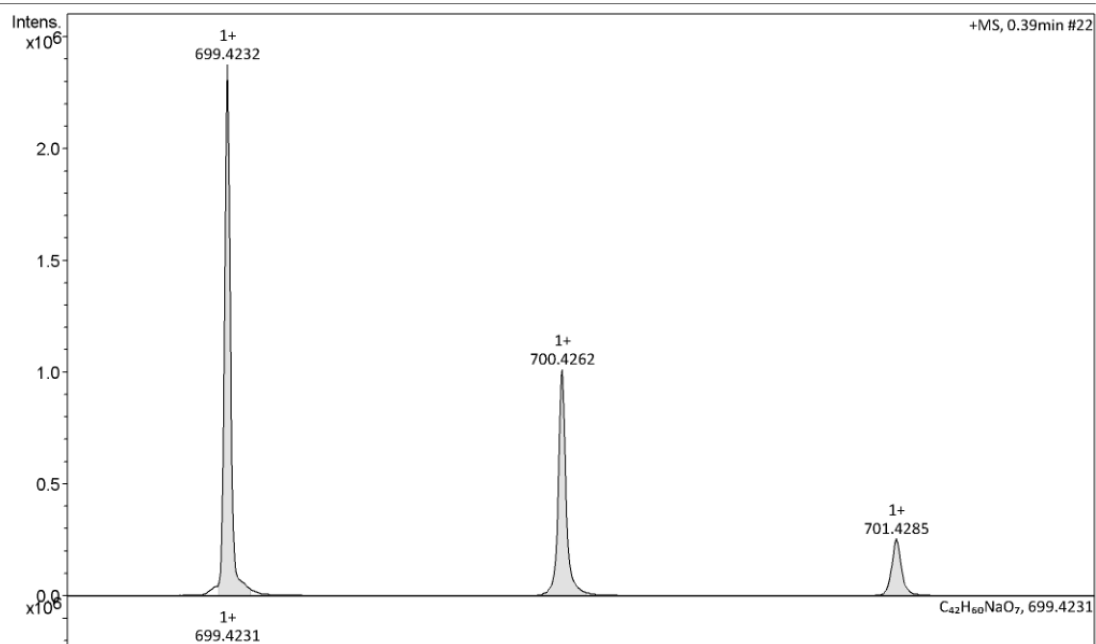

HRMS of compound FA-12

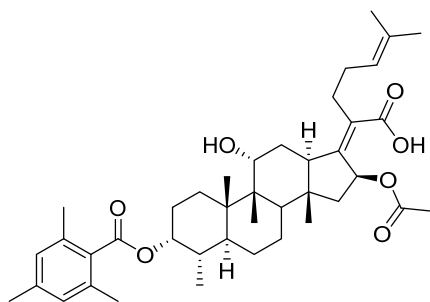

Structure of FA-13

FA-E-19

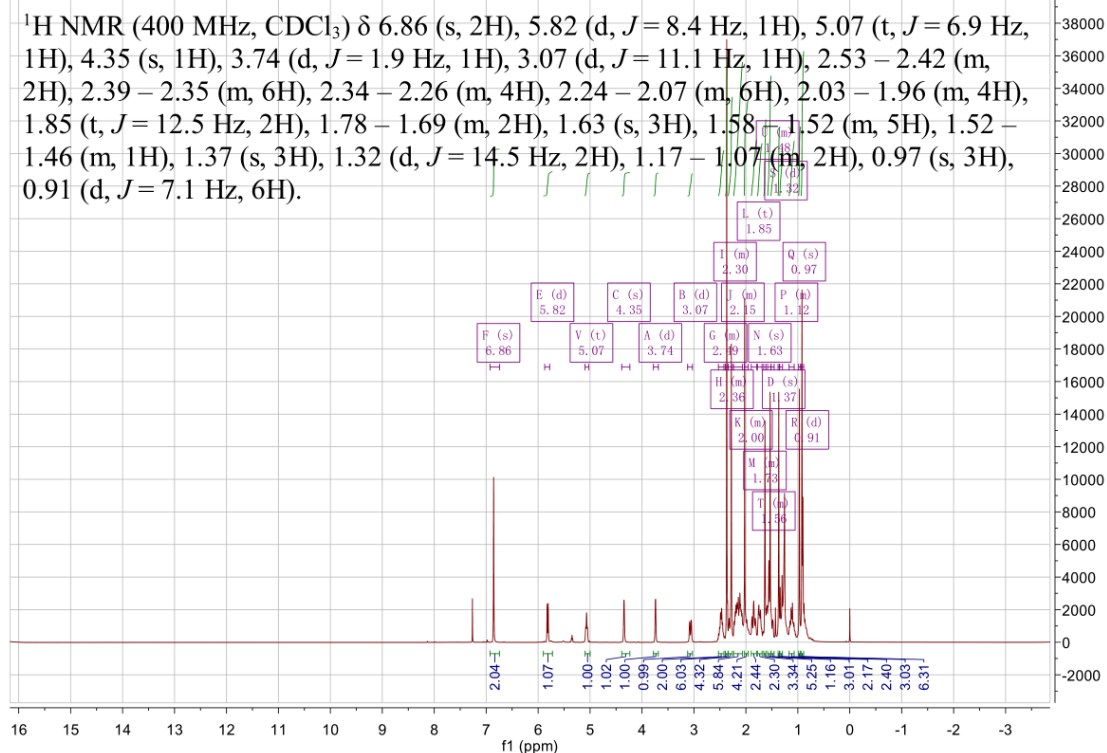

$^1\text{H}$  NMR of compound FA-13

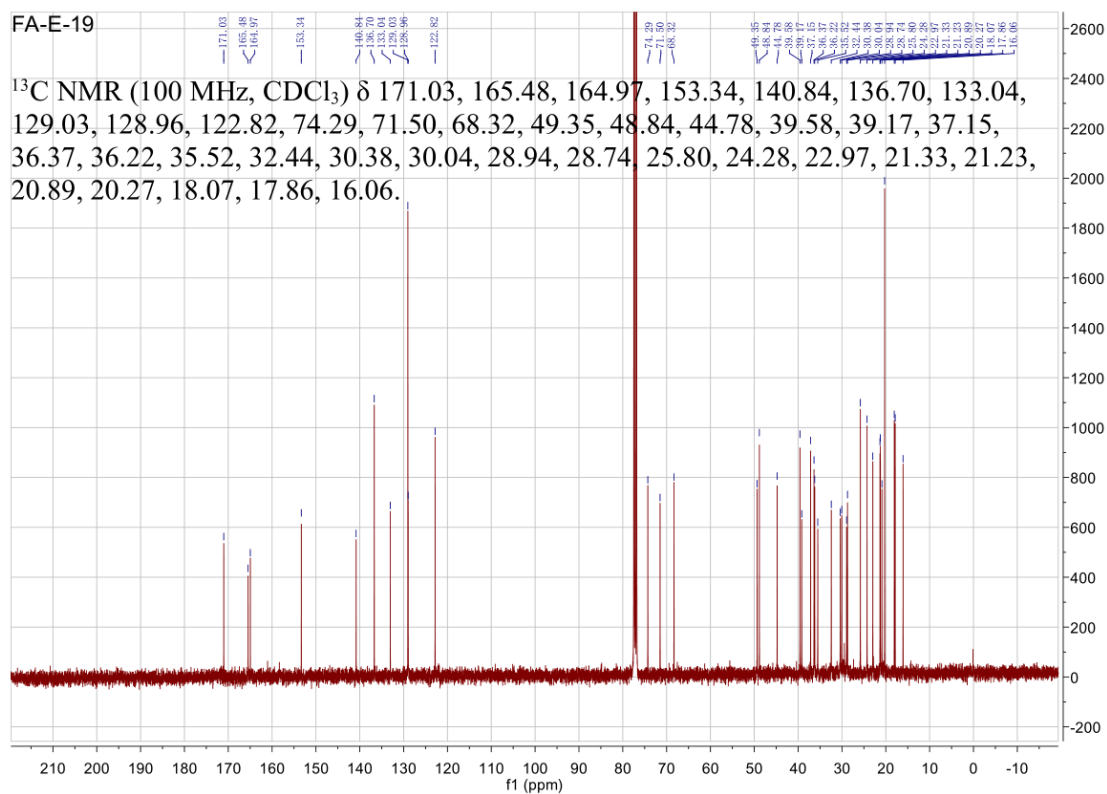

$^{13}\text{C}$  NMR of compound FA-13

Sample Name 17032203-12  
Comment

Instrument maXis impact

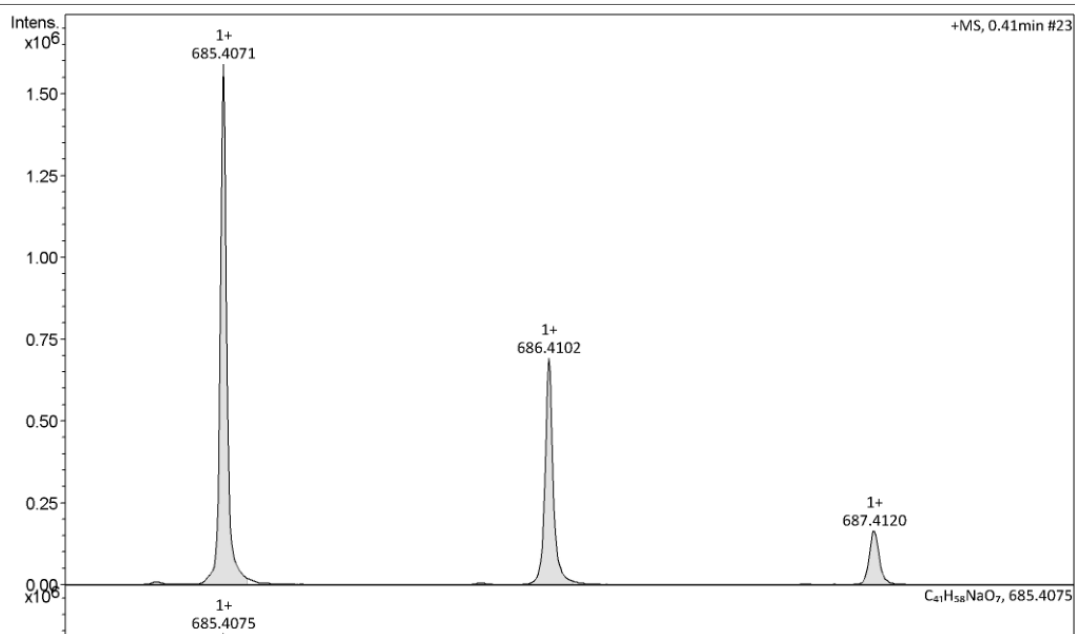

HRMS of compound FA-13

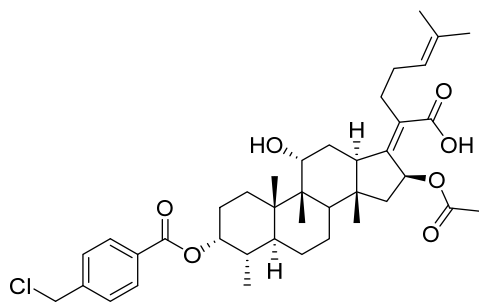

Structure of FA-14

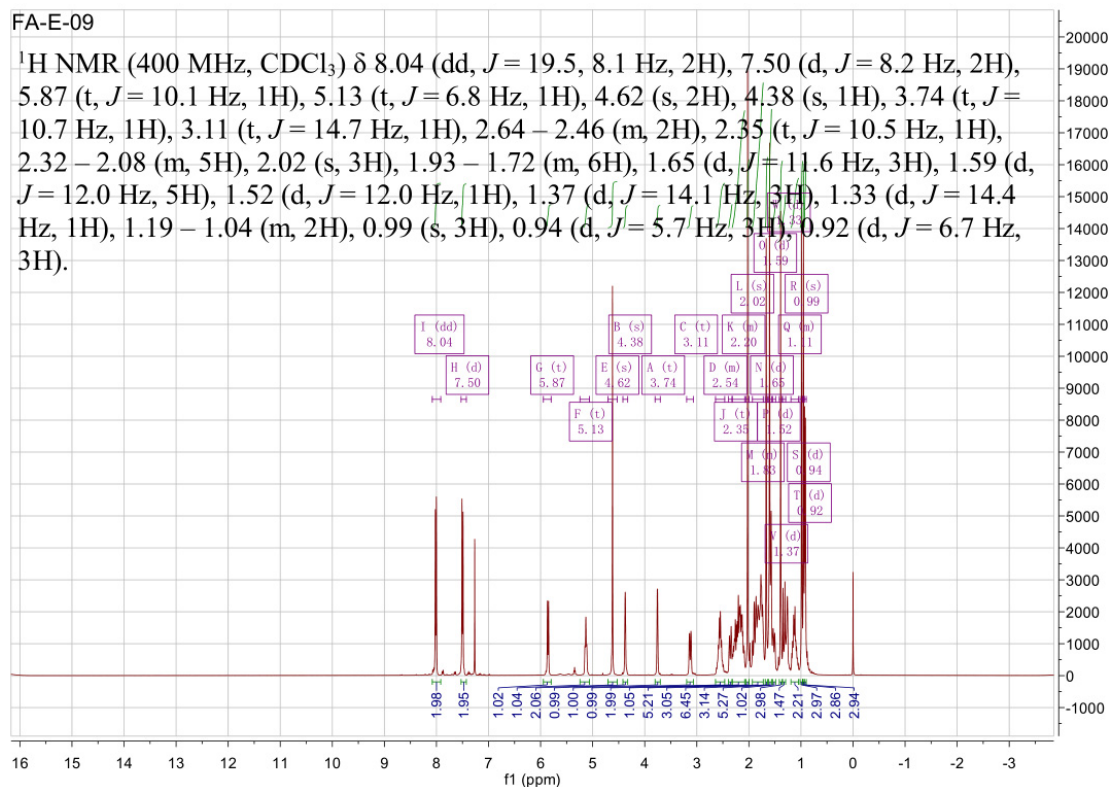

$^1\text{H}$  NMR of compound FA-14

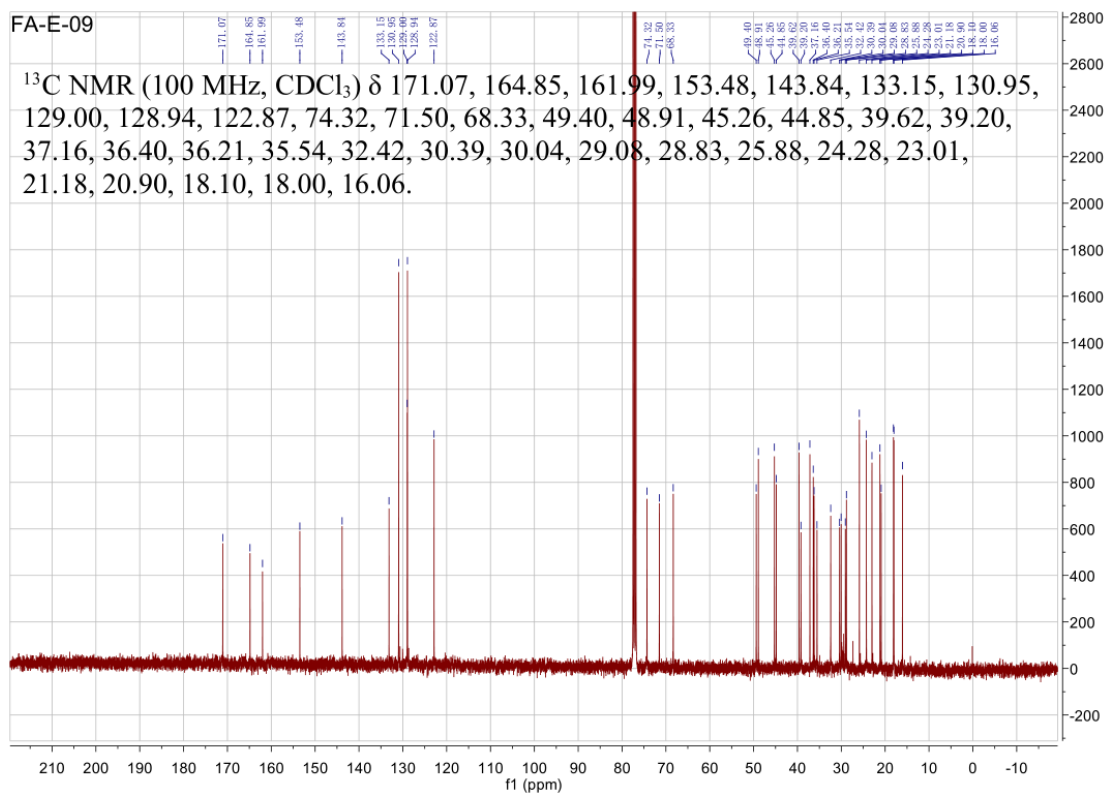

$^{13}\text{C}$  NMR of compound FA-14

Sample Name 17032203-5  
Comment

Instrument maXis impact

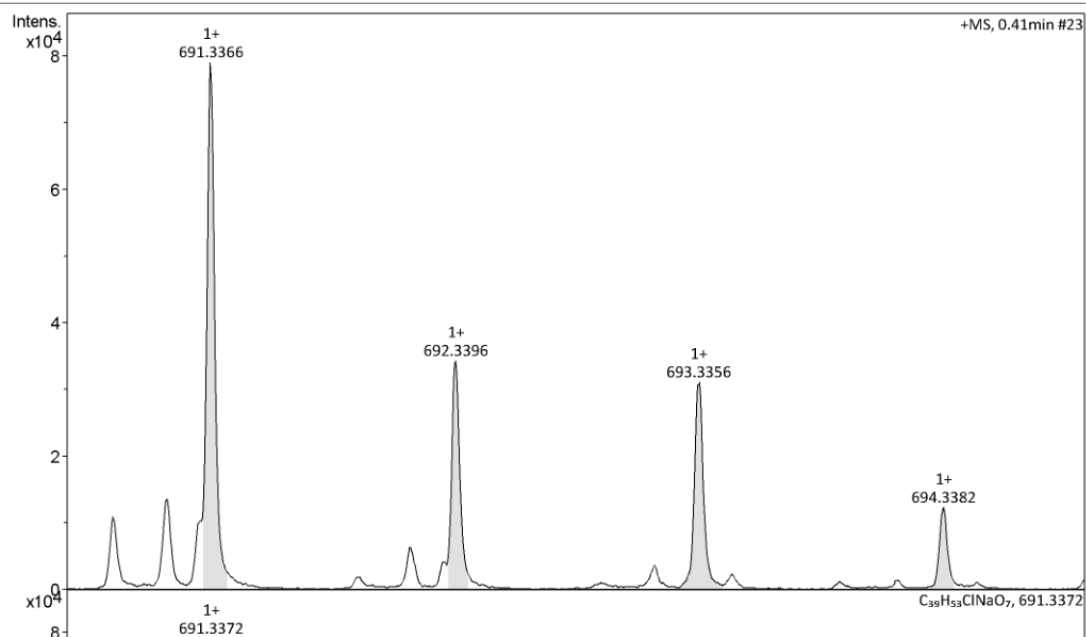

HRMS of compound FA-14



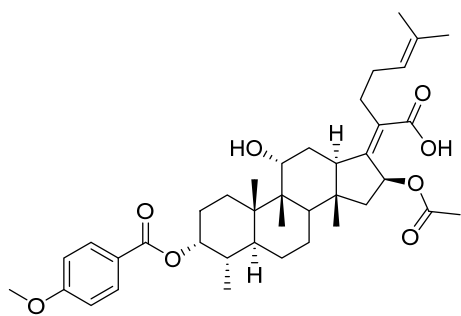

Structure of FA-15

FA-E-20

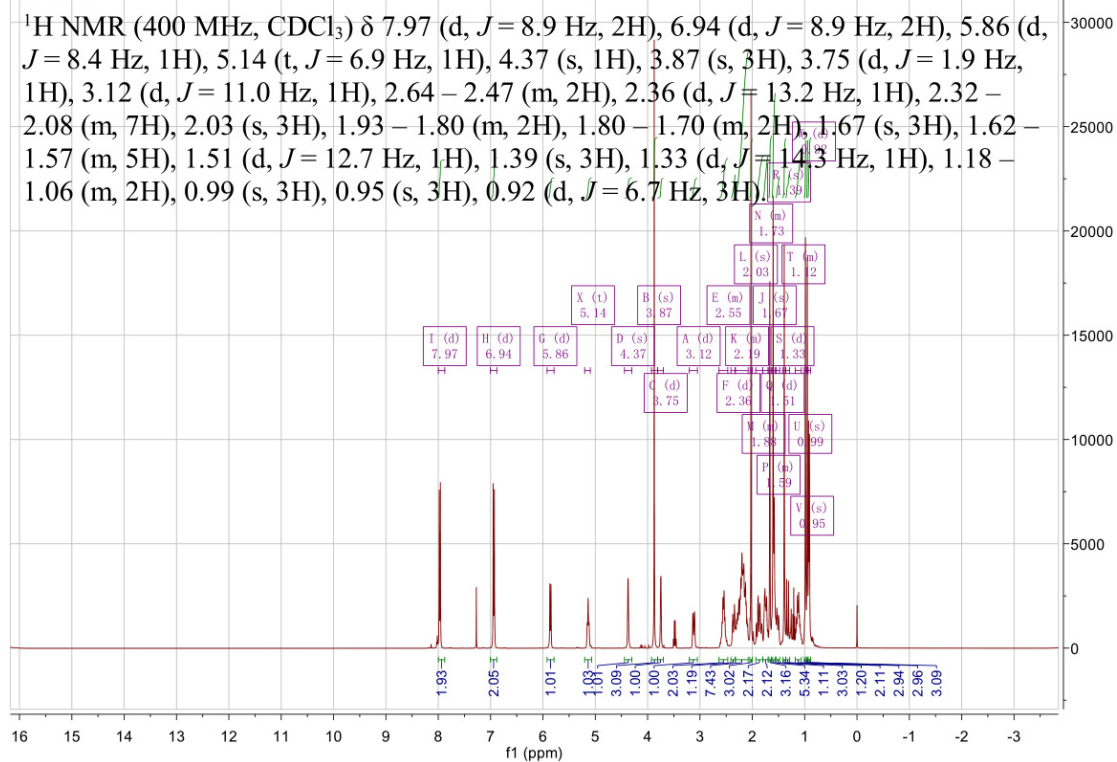

$^1\text{H}$  NMR of compound FA-15

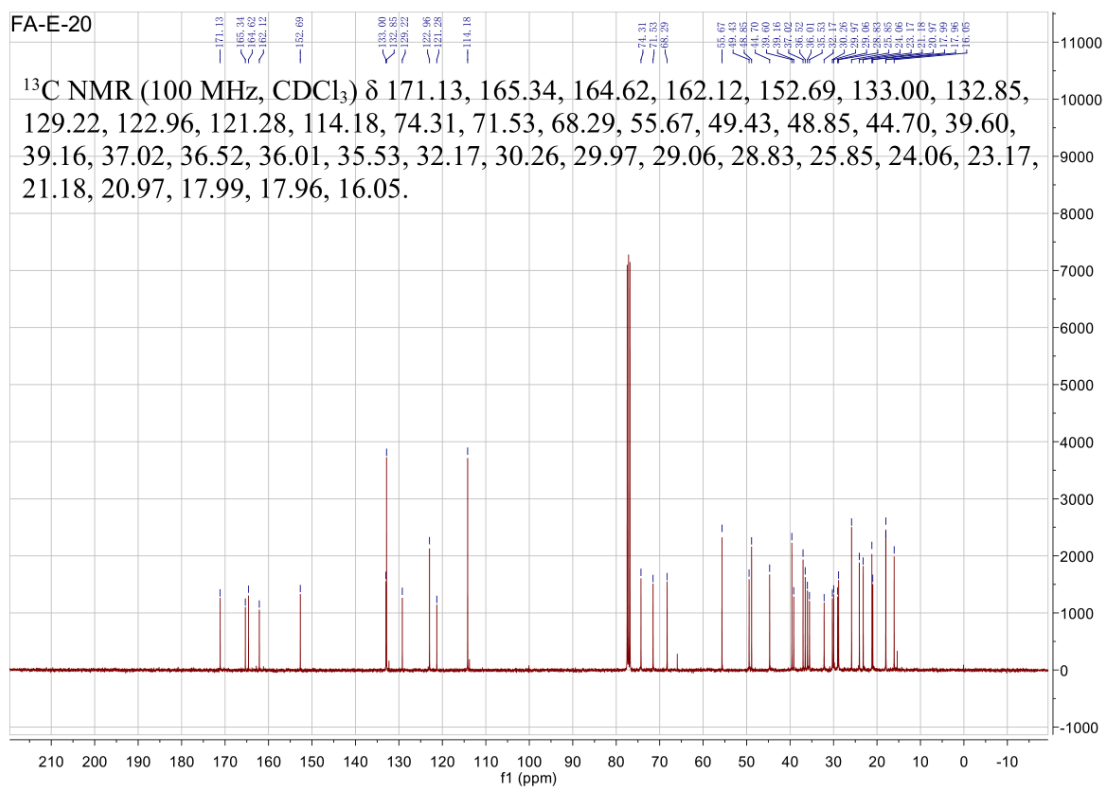

$^{13}\text{C}$  NMR of compound FA-15

Sample Name 17032203-13  
Comment

Instrument maXis impact

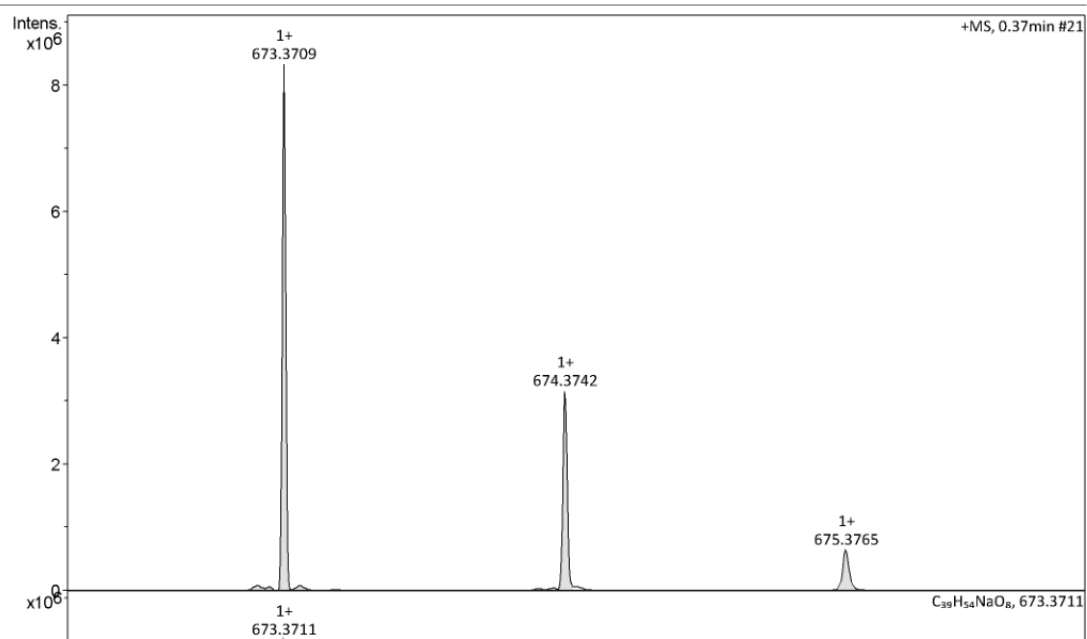

HRMS of compound FA-15

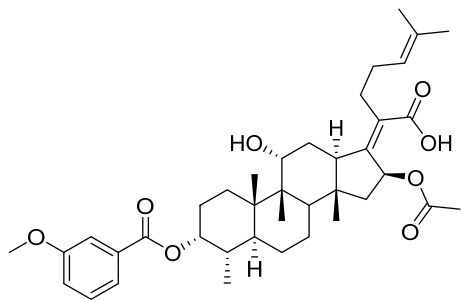

Structure of FA-16

FA-E-28

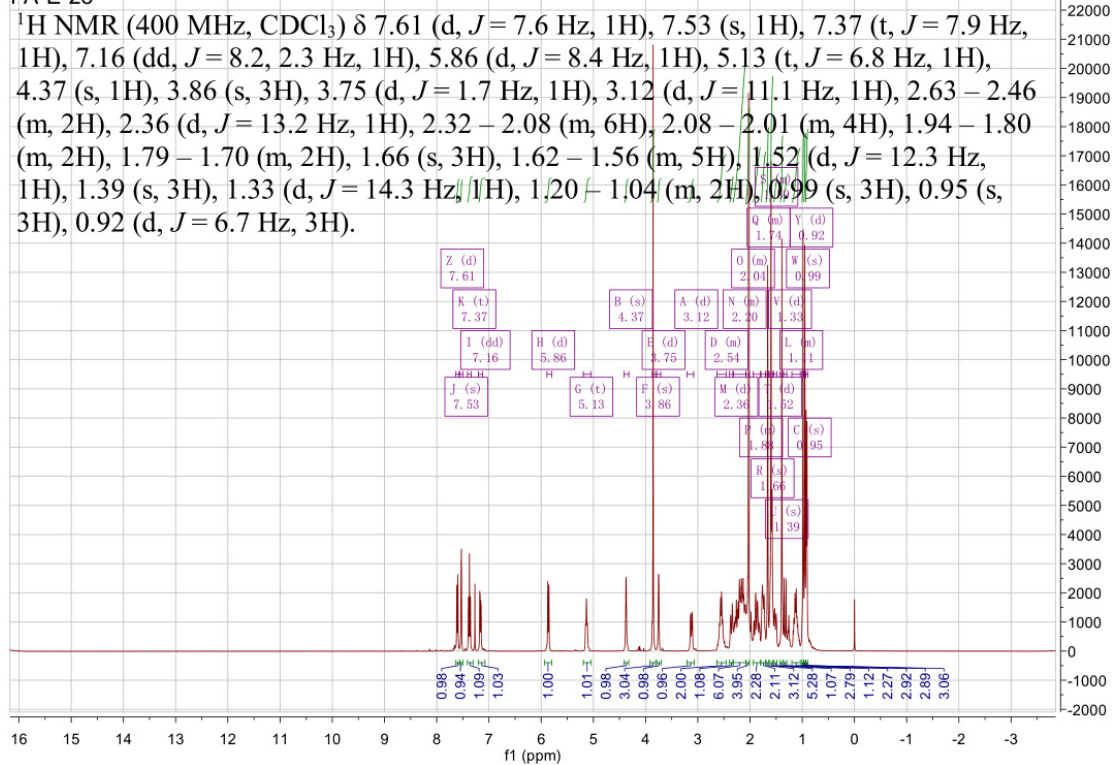

$^1\text{H}$  NMR of compound FA-16

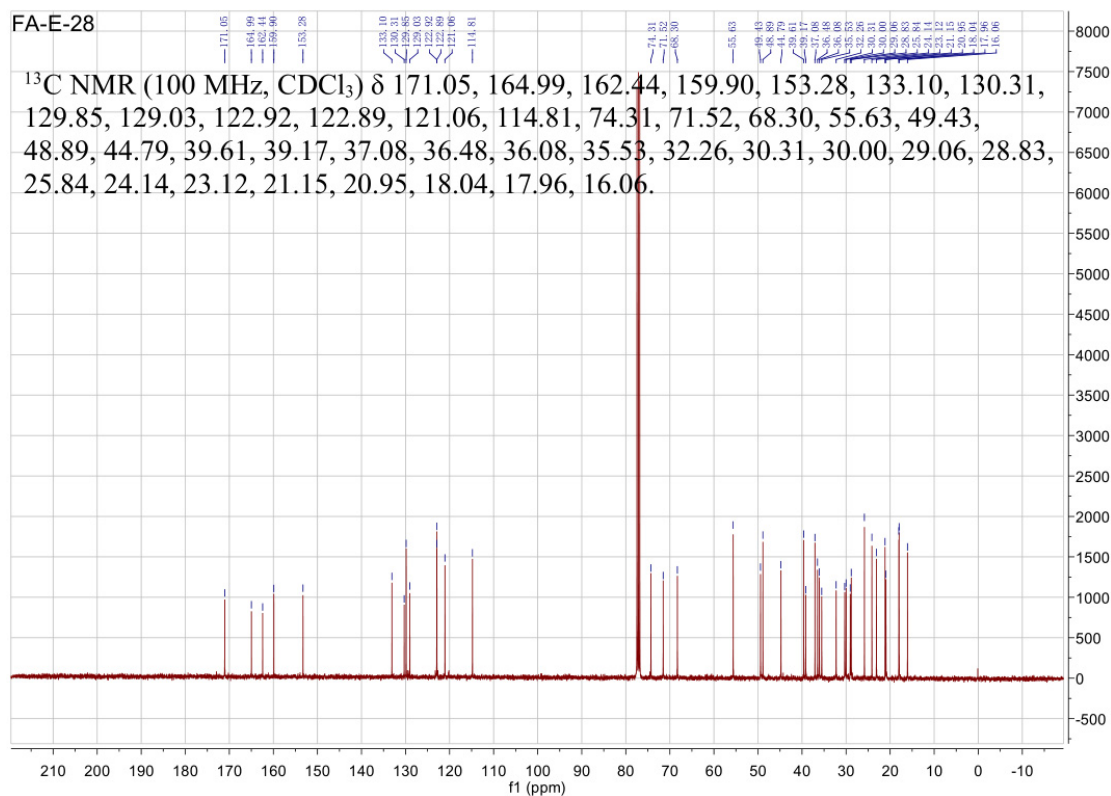

$^{13}\text{C}$  NMR of compound FA-16

Sample Name 17032203-17  
Comment

Instrument maXis impact

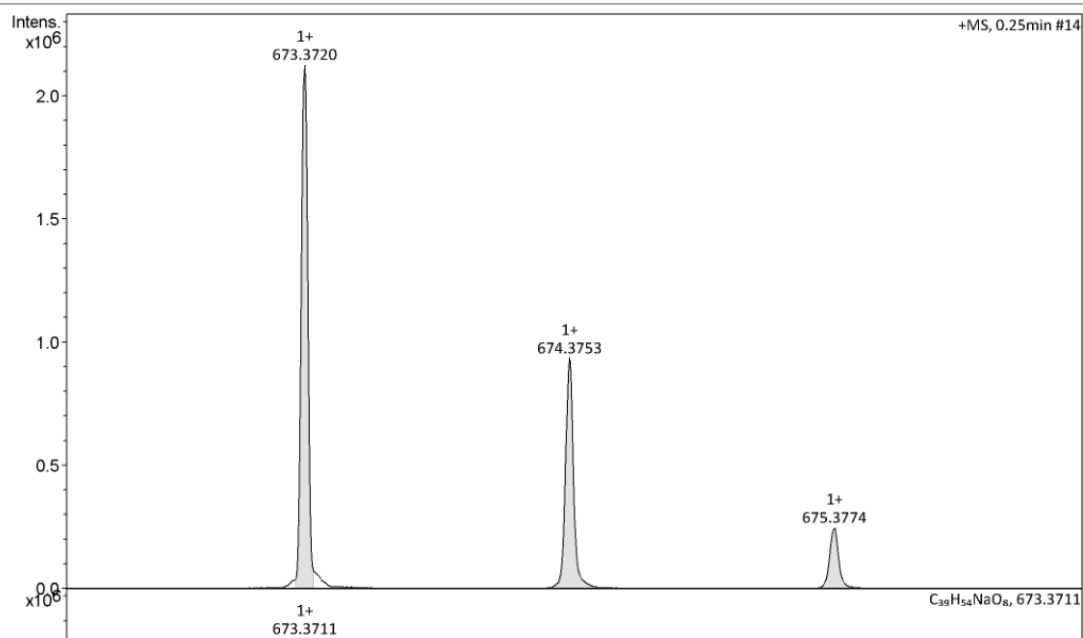

HRMS of compound FA-16

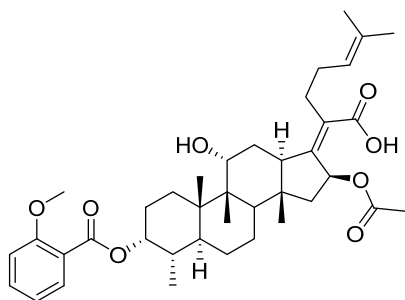

Structure of FA-17

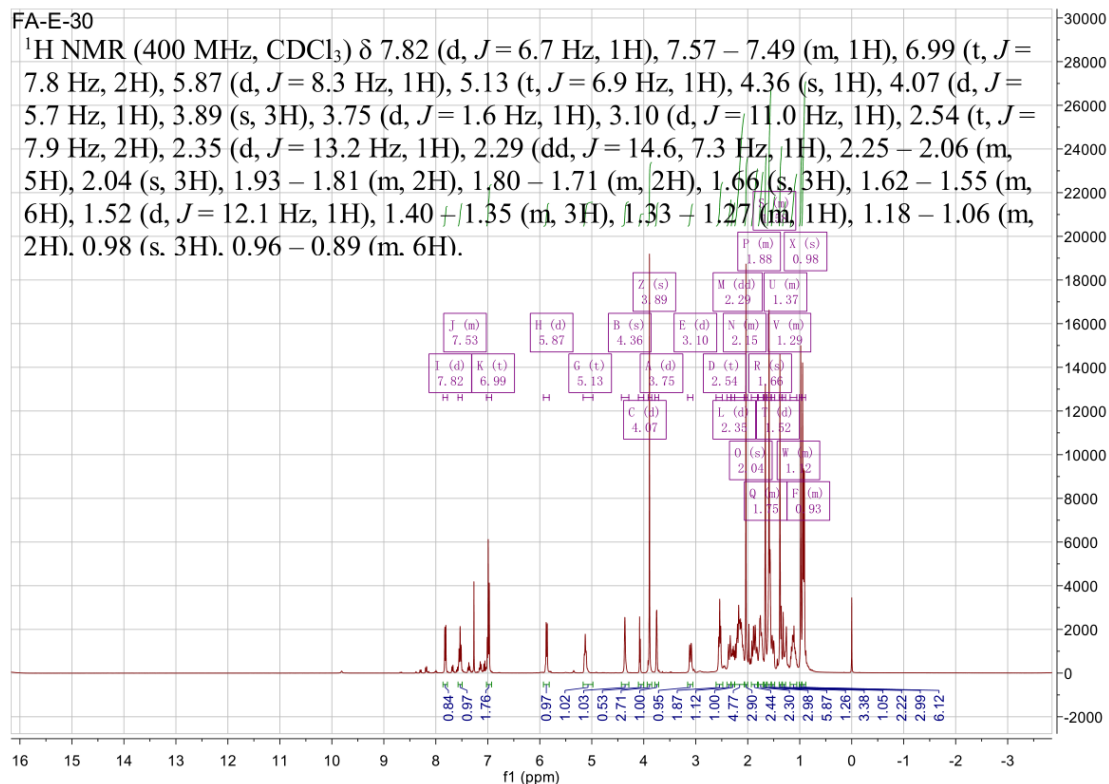

$^1\text{H}$  NMR of compound FA-17

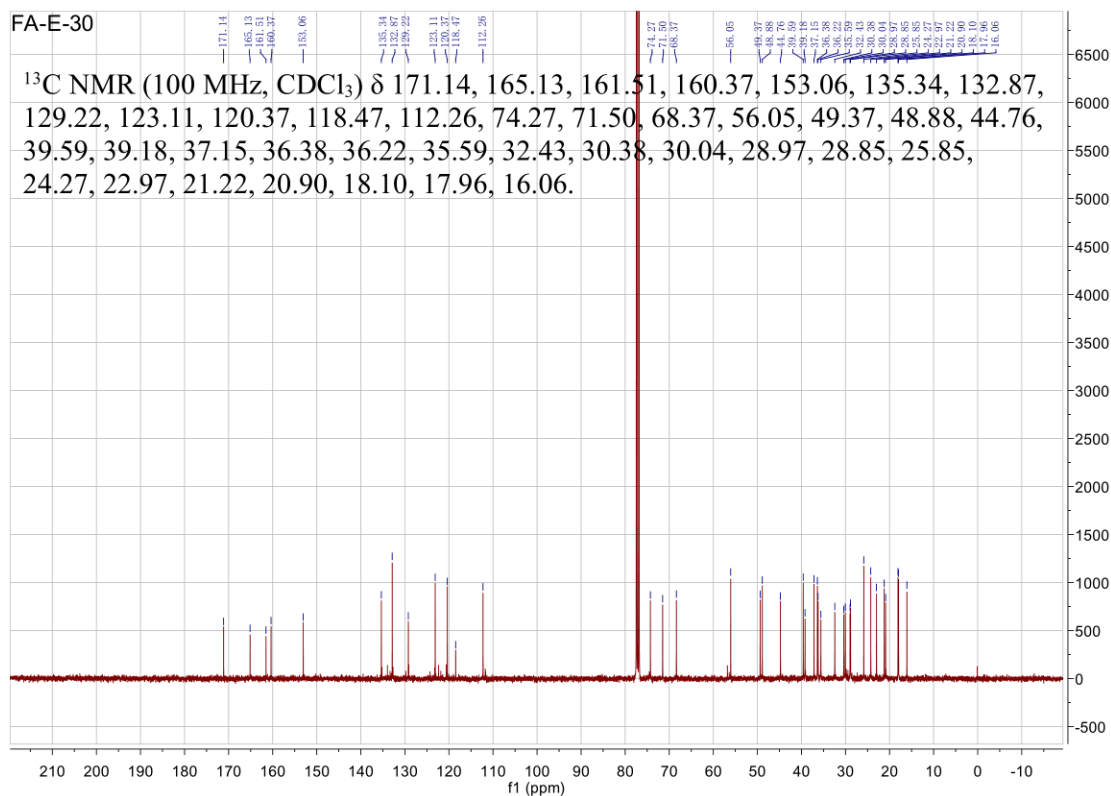

$^{13}\text{C}$  NMR of compound FA-17

Sample Name 17032203-19  
Comment

Instrument maXis impact

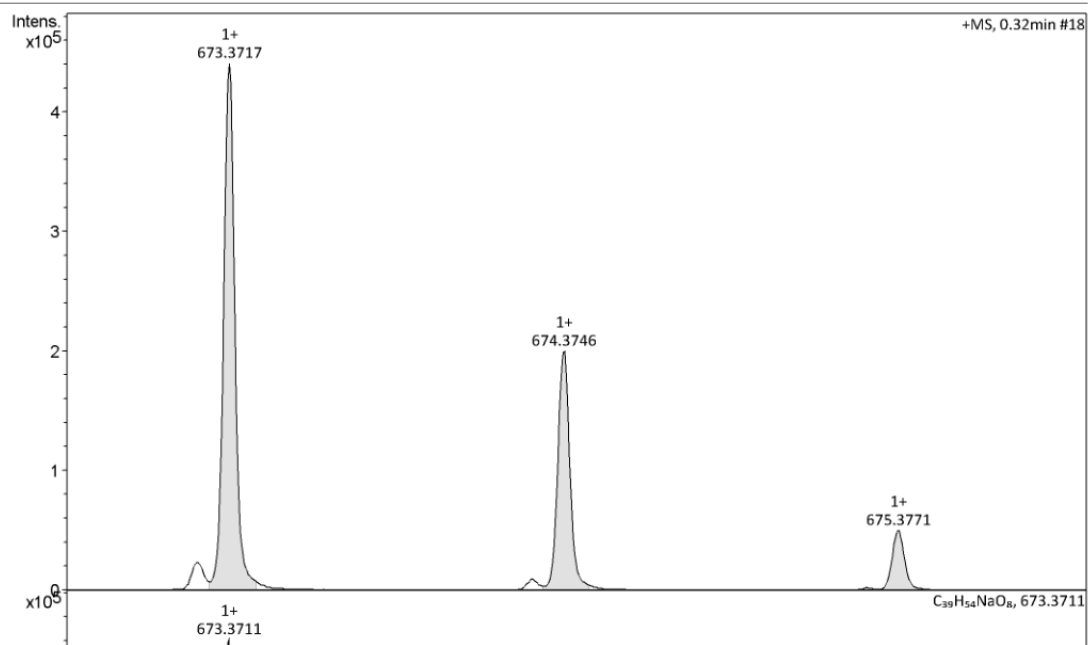

HRMS of compound FA-17

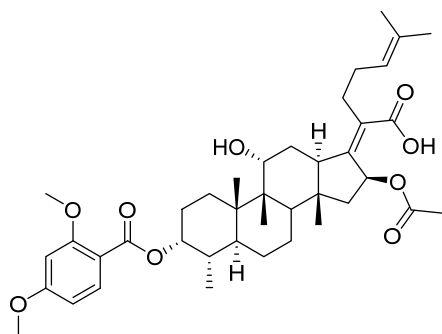

Structure of FA-18

FA-E-14

$^1\text{H}$  NMR (400 MHz,  $\text{CDCl}_3$ )  $\delta$  7.83 (d,  $J = 8.8$  Hz, 1H), 6.59 – 6.38 (m, 2H), 5.86 (d,  $J = 8.2$  Hz, 1H), 5.13 (t,  $J = 6.8$  Hz, 1H), 4.36 (s, 1H), 3.87 (d,  $J = 2.2$  Hz, 6H), 3.75 (s, 1H), 3.10 (d,  $J = 11.0$  Hz, 1H), 2.53 (t,  $J = 7.8$  Hz, 2H), 2.36 (d,  $J = 13.1$  Hz, 1H), 2.32 – 2.26 (m, 1H), 2.25 – 2.07 (m, 5H), 2.04 (s, 3H), 1.93 – 1.81 (m, 2H), 1.79 – 1.71 (m, 2H), 1.67 (s, 3H), 1.62 – 1.56 (m, 5H), 1.52 (d,  $J = 12.5$  Hz, 1H), 1.40 – 1.34 (m, 3H), 1.33 – 1.22 (m, 2H), 1.18 – 1.06 (m, 2H), 0.98 (s, 3H), 0.96 – 0.89 (m, 6H).

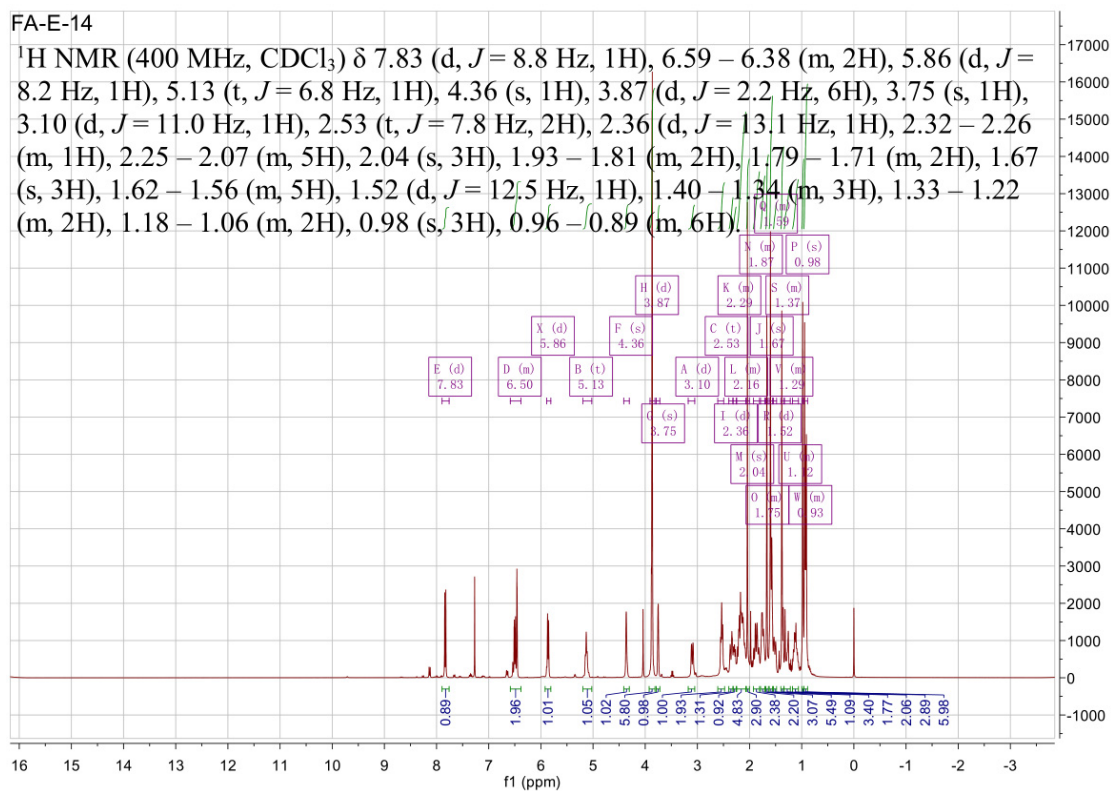

$^1\text{H}$  NMR of compound FA-18

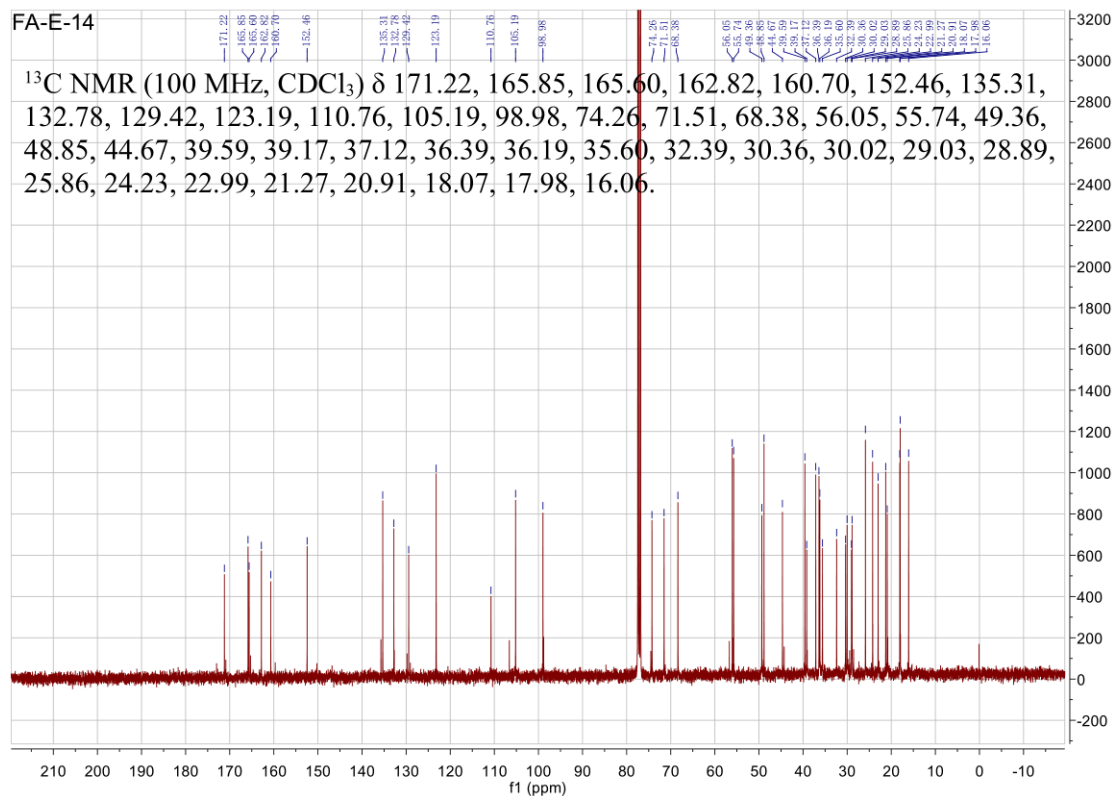

$^{13}\text{C}$  NMR of compound FA-18

Sample Name 17032203-8  
Comment

Instrument maXis impact

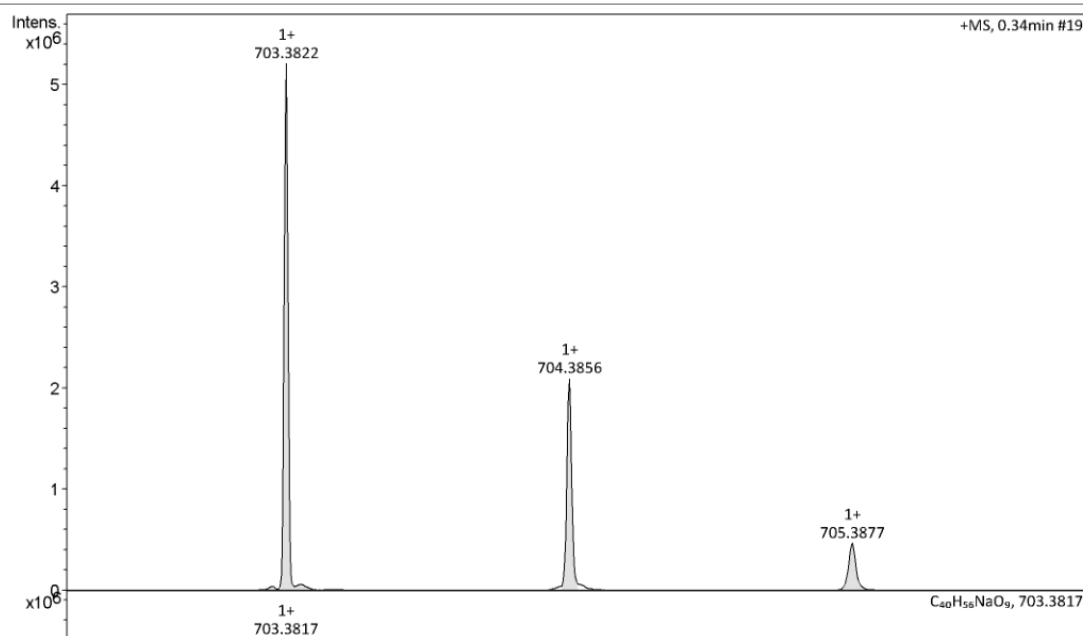

HRMS of compound FA-18



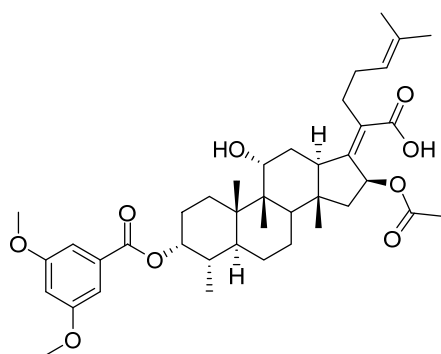

Structure of FA-19

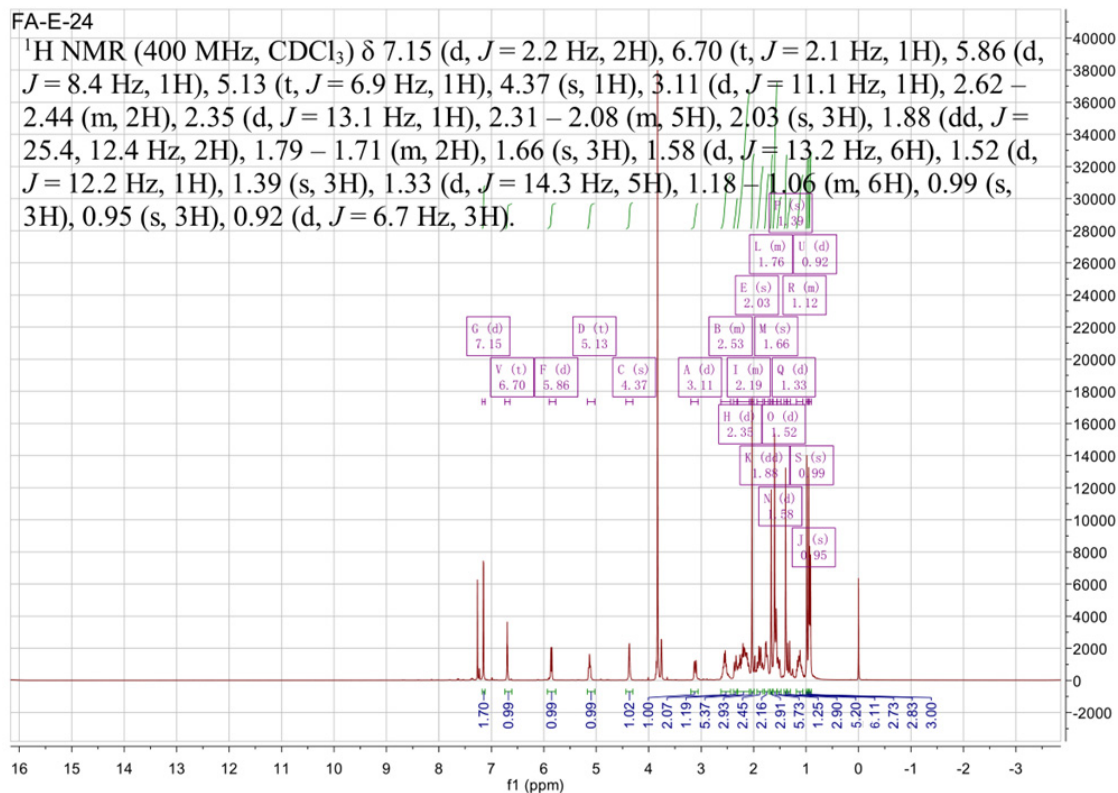

$^1\text{H}$  NMR of compound FA-19

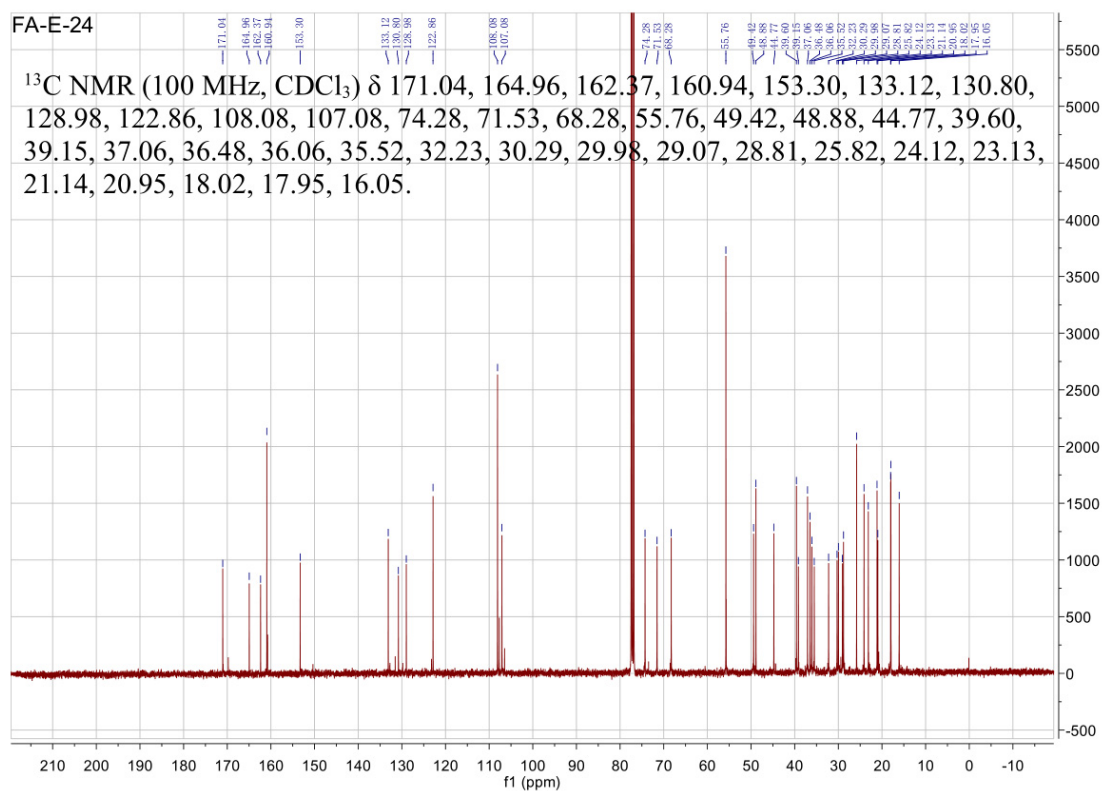

$^{13}\text{C}$  NMR of compound FA-19

Sample Name 17032203-15  
Comment

Instrument maXis impact

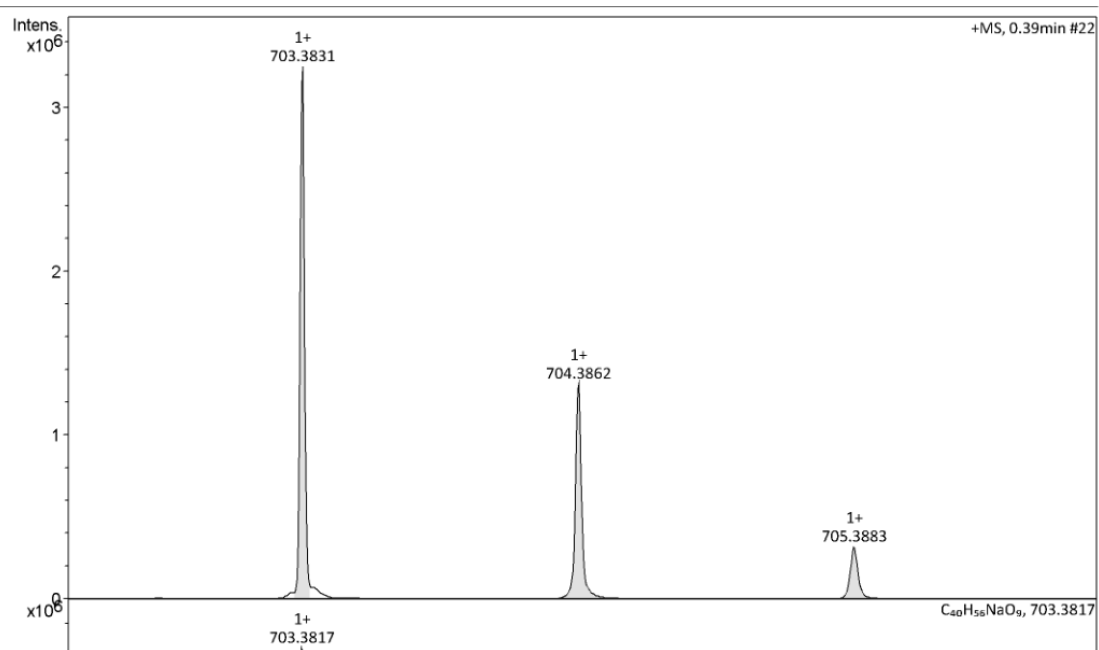

HRMS of compound FA-19

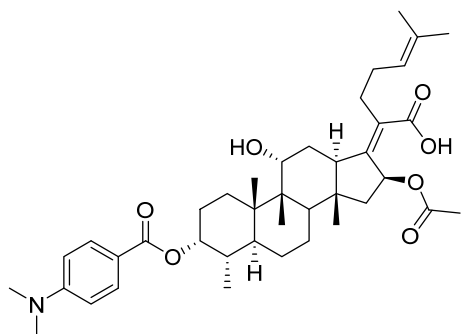

Structure of FA-20

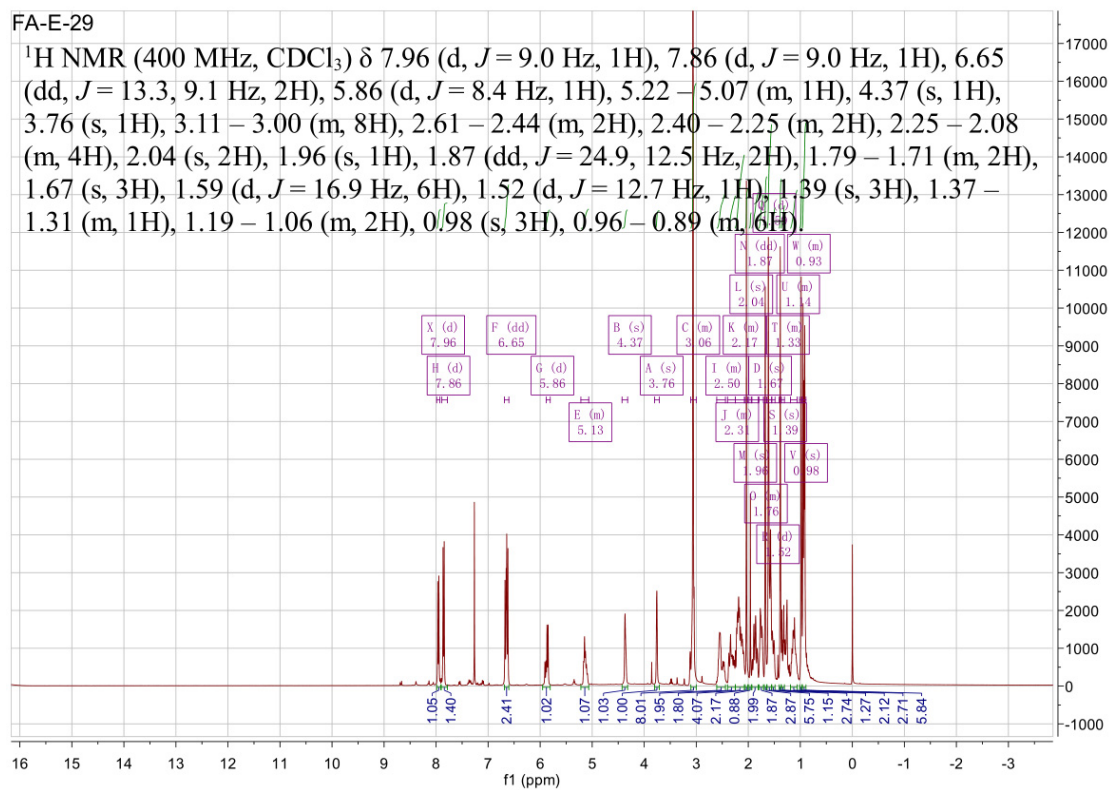

$^1\text{H}$  NMR of compound FA-20

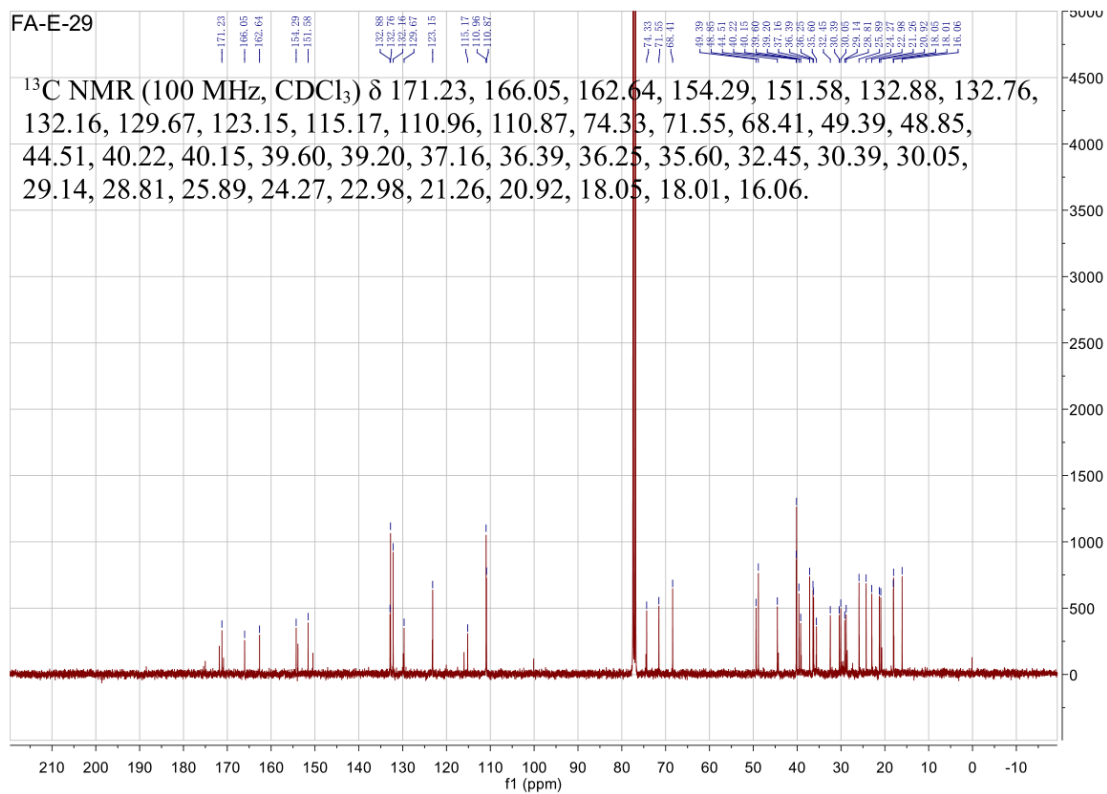

$^{13}\text{C}$  NMR of compound FA-20

Sample Name 17032203-18  
Comment

Instrument maXis impact

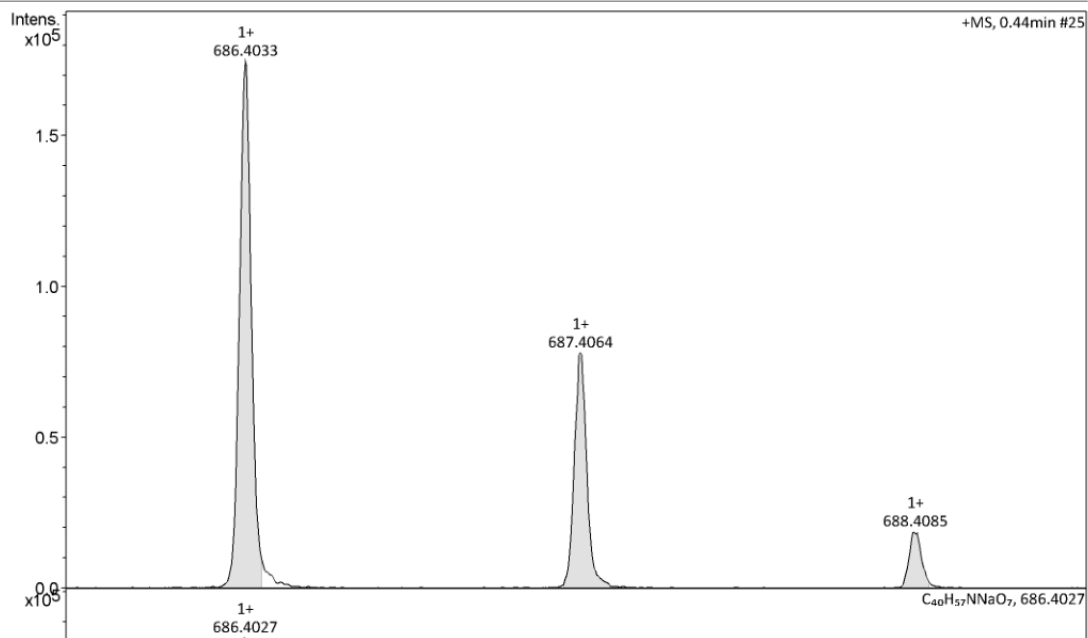

HRMS of compound FA-20

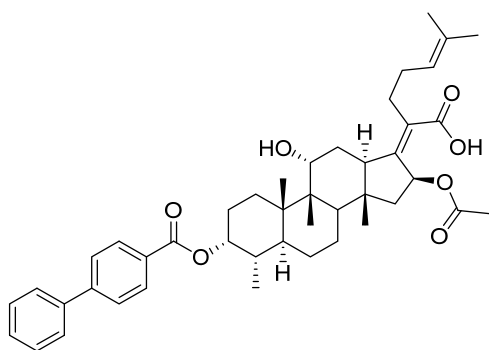

Structure of FA-21

FA-E-17

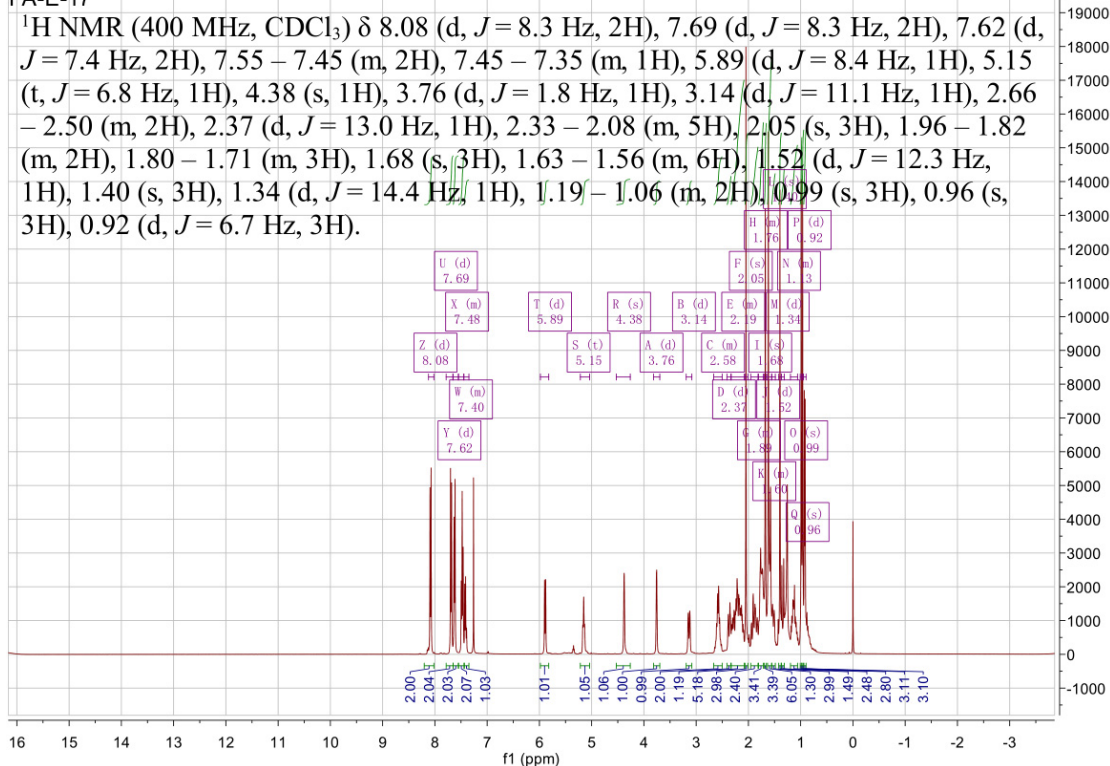

$^1\text{H}$  NMR of compound FA-21

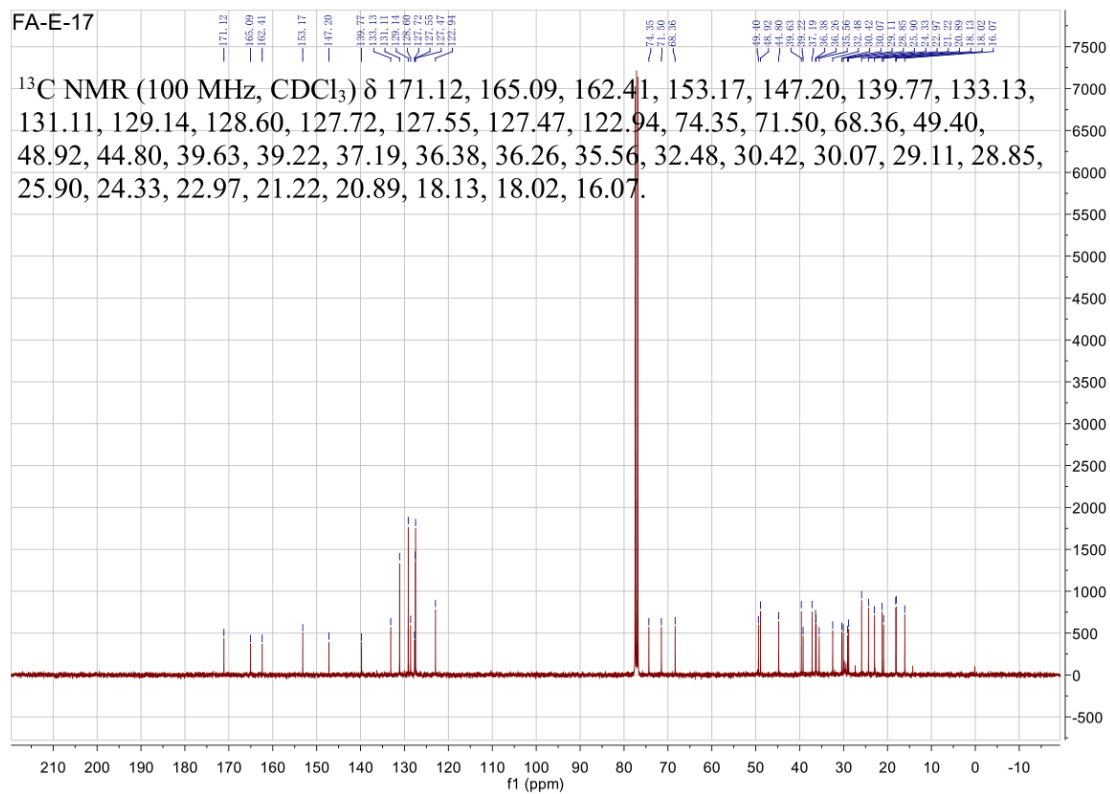

$^{13}\text{C}$  NMR of compound FA-21

Sample Name 17032203-11  
Comment

Instrument maXis impact

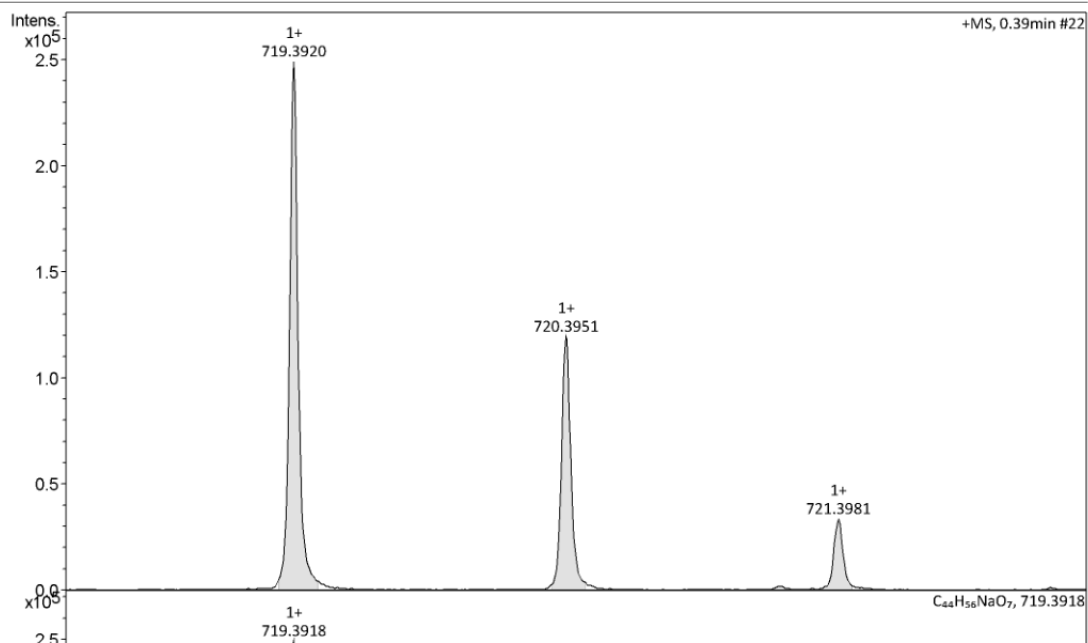

HRMS of compound FA-21

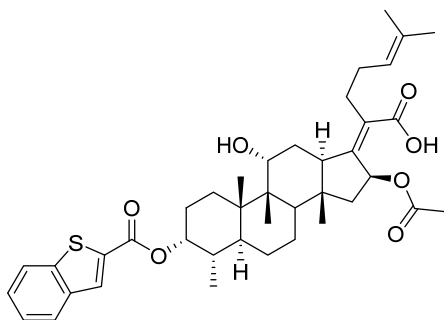

Structure of FA-22

FA-E-26

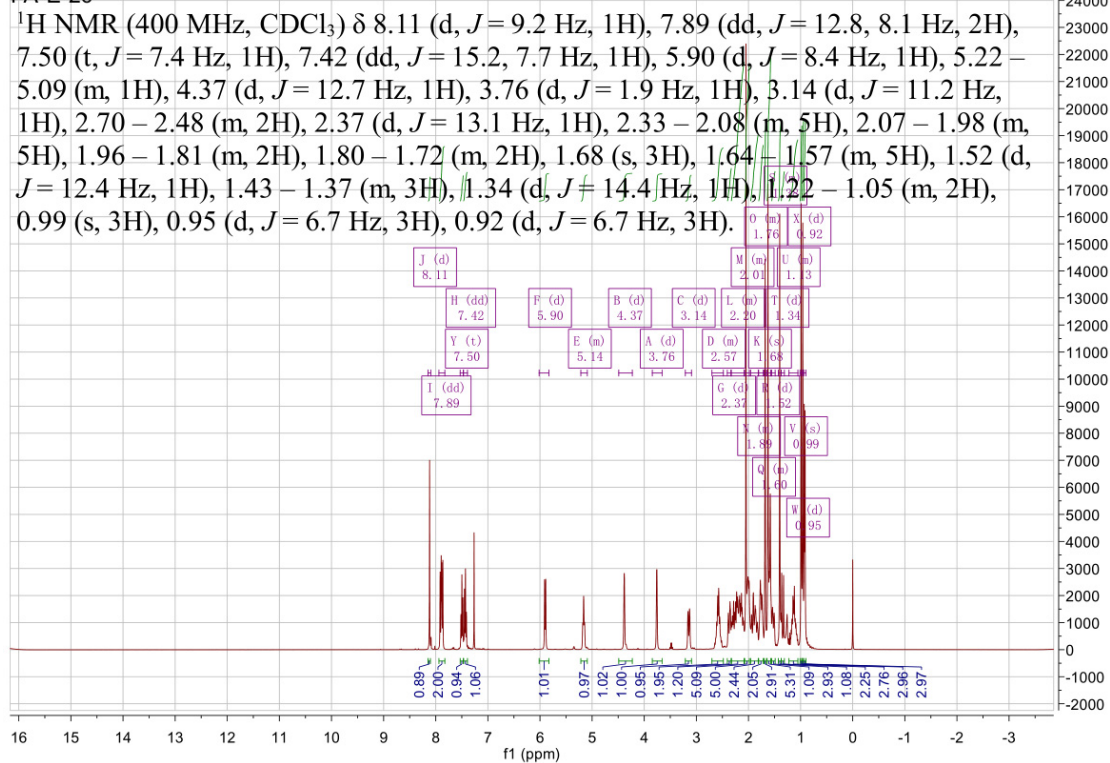

$^1\text{H}$  NMR of compound FA-22

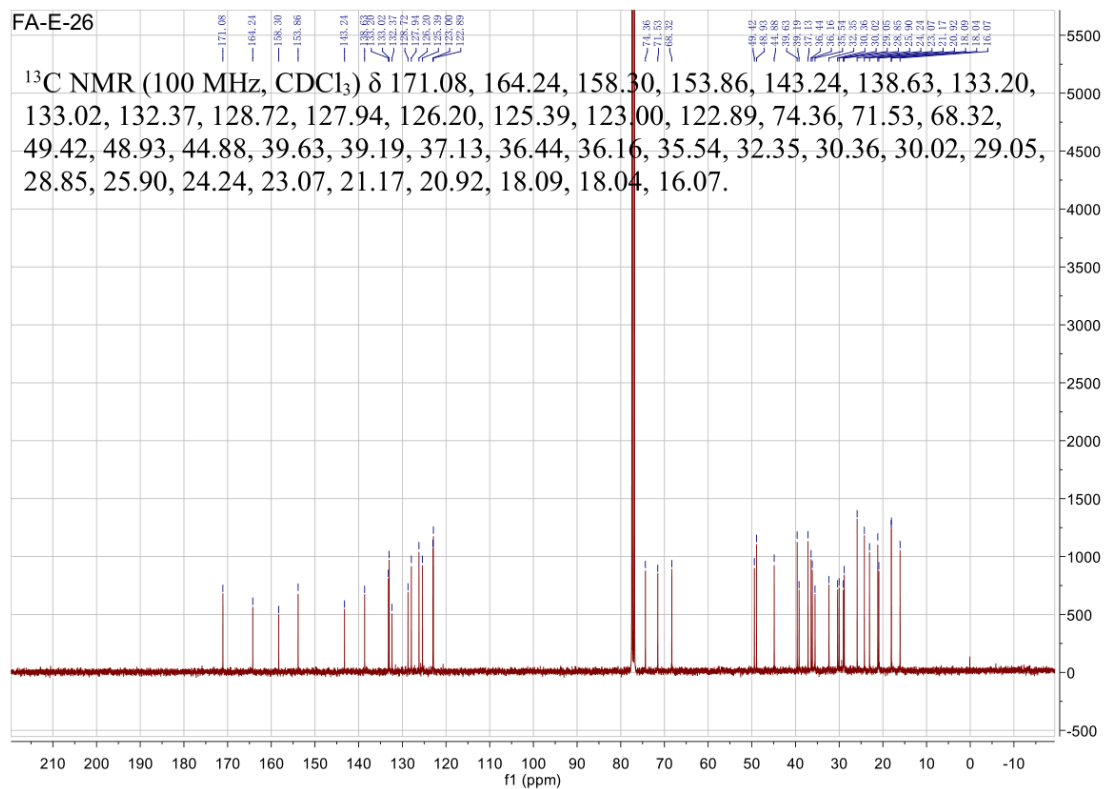

$^{13}\text{C}$  NMR of compound FA-22

Sample Name 17032203-16  
Comment

Instrument maXis impact

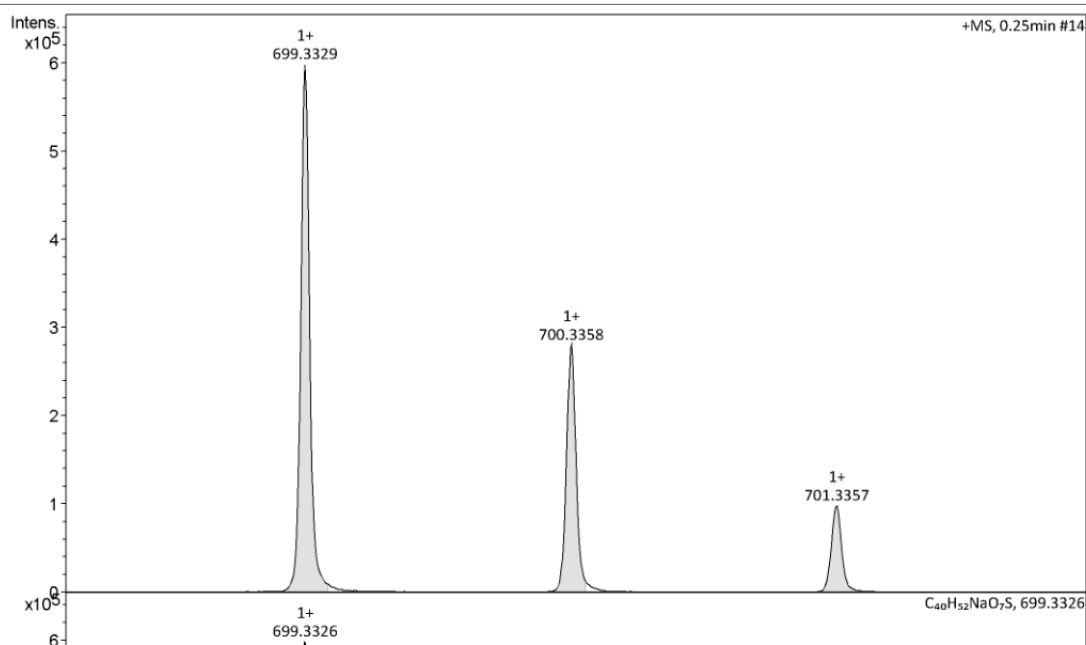

HRMS of compound FA-22



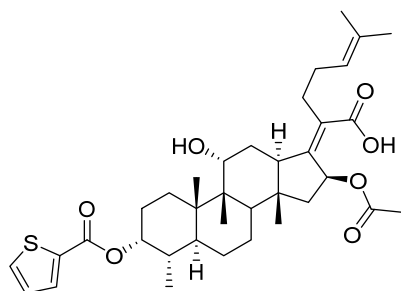

Structure of FA-23

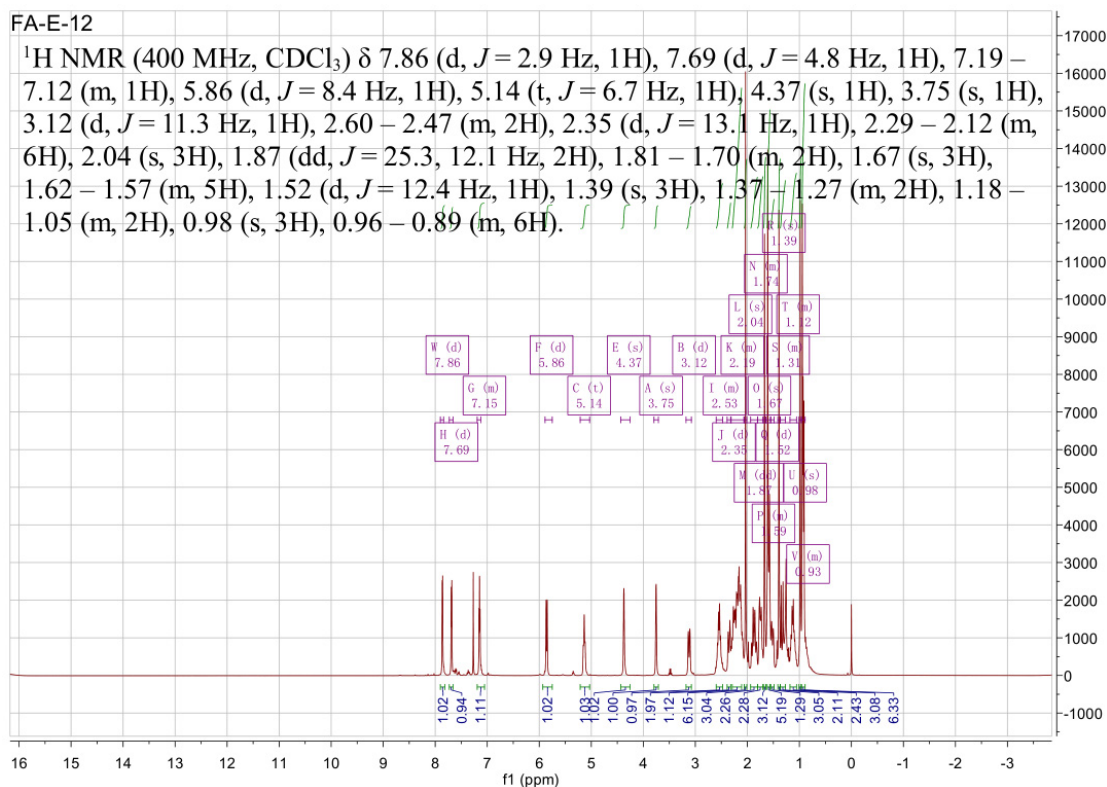

$^1\text{H}$  NMR of compound FA-23

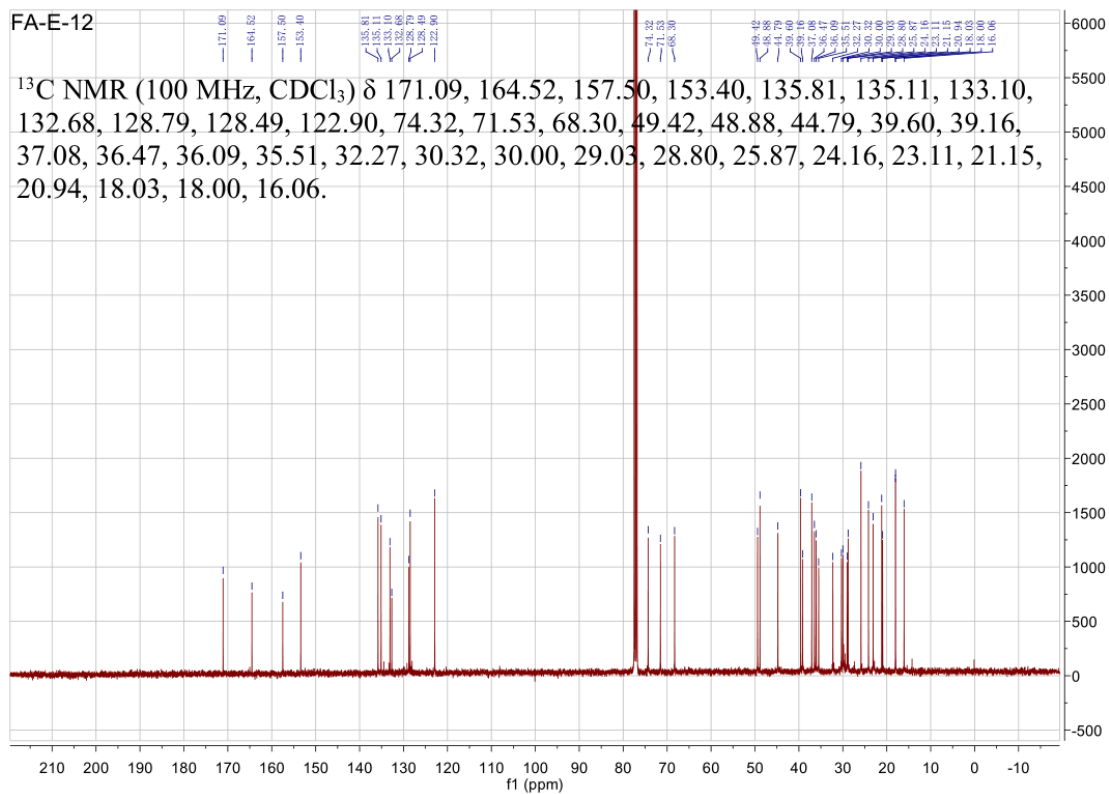

$^{13}\text{C}$  NMR of compound FA-23

Sample Name 17032203-7  
Comment

Instrument maXis impact

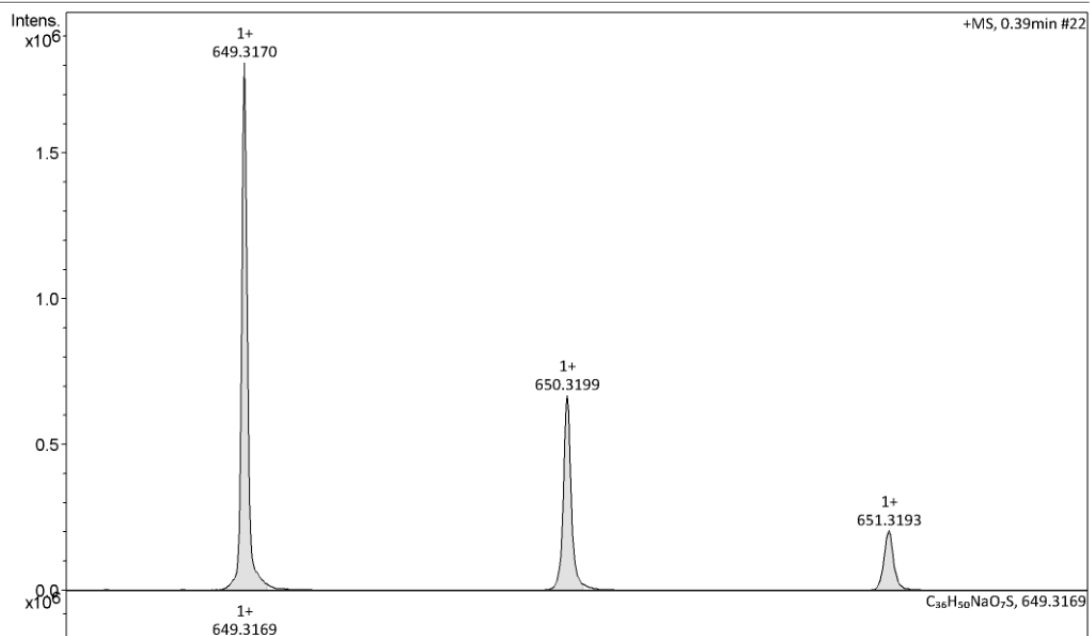

HRMS of compound FA-23

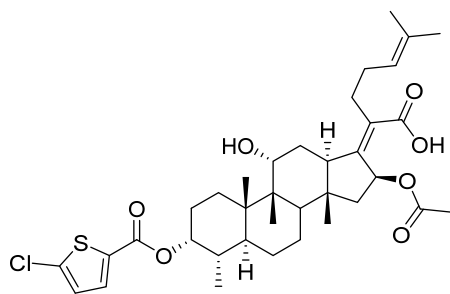

Structure of FA-24

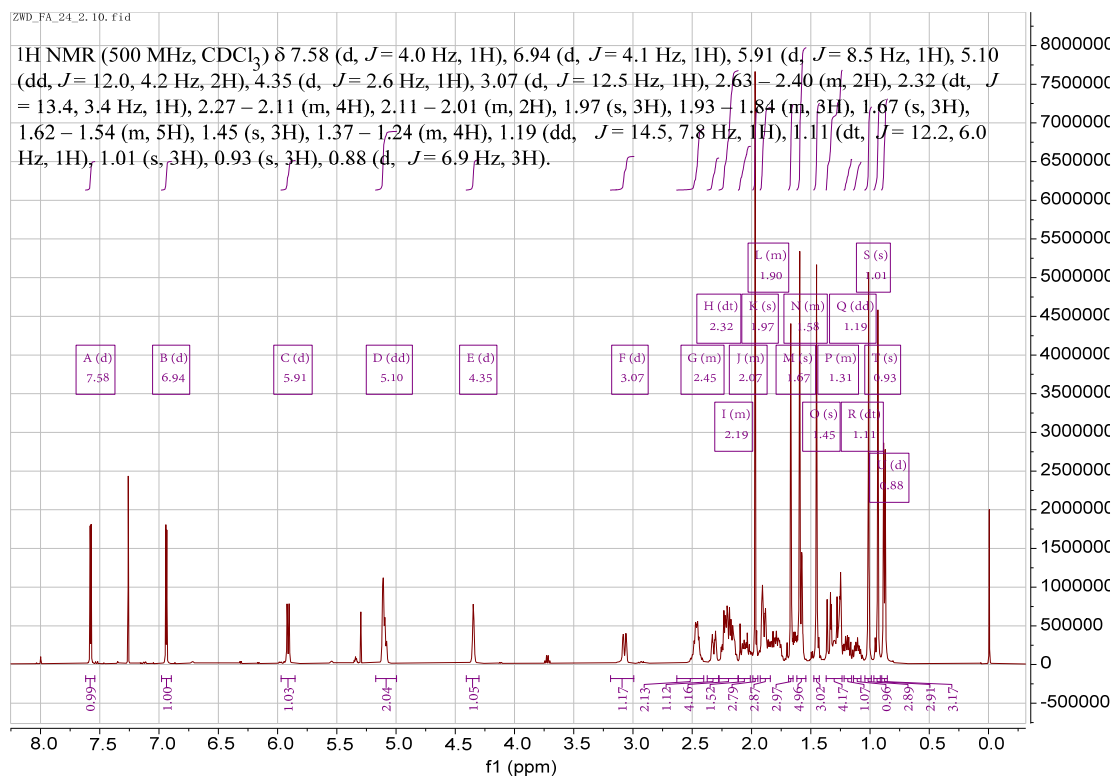

$^1\text{H}$  NMR of compound FA-24

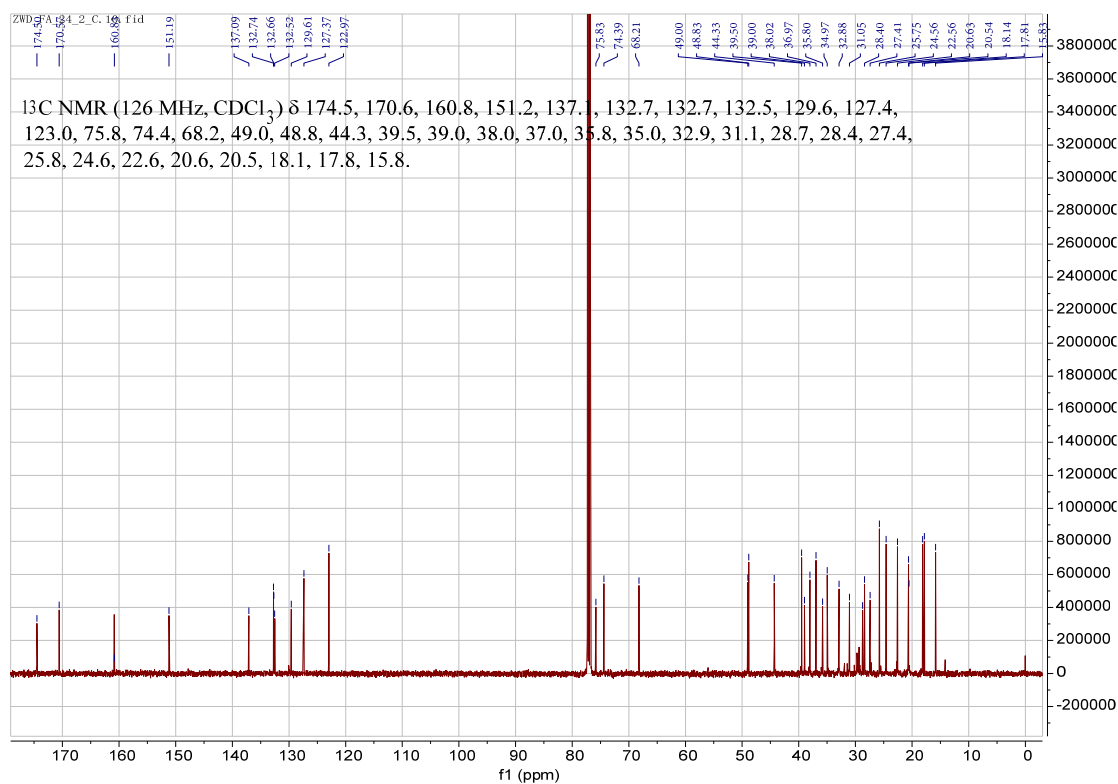

$^{13}\text{C}$  NMR of compound FA-24

Sample Name 17032203-20  
Comment

Instrument maXis impact

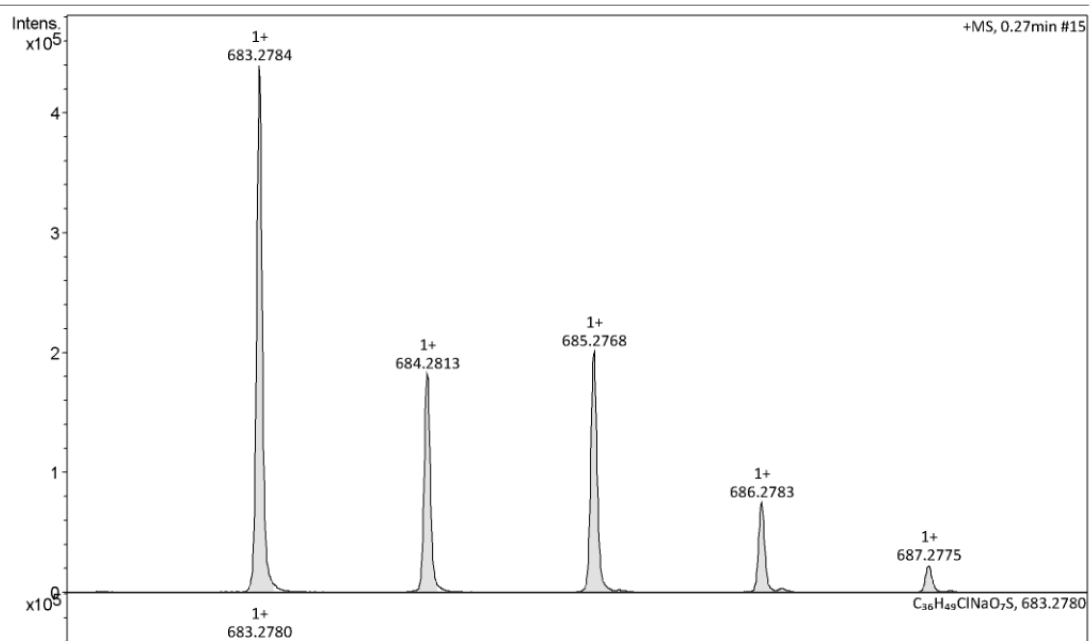

HRMS of compound FA-24

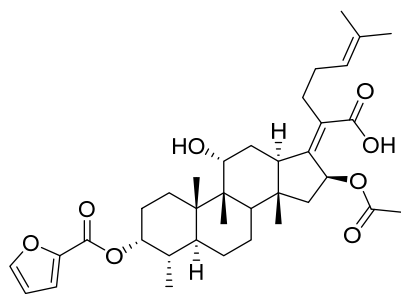

Structure of FA-25

FA-E-10

$^1\text{H}$  NMR (400 MHz,  $\text{CDCl}_3$ )  $\delta$  7.66 (s, 1H), 7.30 (d,  $J = 3.4$  Hz, 1H), 6.63 – 6.46 (m, 1H), 5.85 (d,  $J = 8.4$  Hz, 1H), 5.13 (t,  $J = 6.9$  Hz, 1H), 4.37 (s, 1H), 3.76 (s, 1H), 3.12 (d,  $J = 11.2$  Hz, 1H), 2.60 – 2.47 (m, 2H), 2.35 (d,  $J = 13.1$  Hz, 1H), 2.31 – 2.08 (m, 5H), 2.03 (s, 3H), 1.87 (dd,  $J = 24.0, 12.0$  Hz, 2H), 1.81 – 1.71 (m, 2H), 1.67 (s, 3H), 1.63 – 1.55 (m, 6H), 1.52 (d,  $J = 12.2$  Hz, 1H), 1.39 (s, 3H), 1.36 – 1.28 (m, 2H), 1.19 – 1.06 (m, 2H), 0.98 (s, 3H), 0.95 – 0.90 (m, 6H).

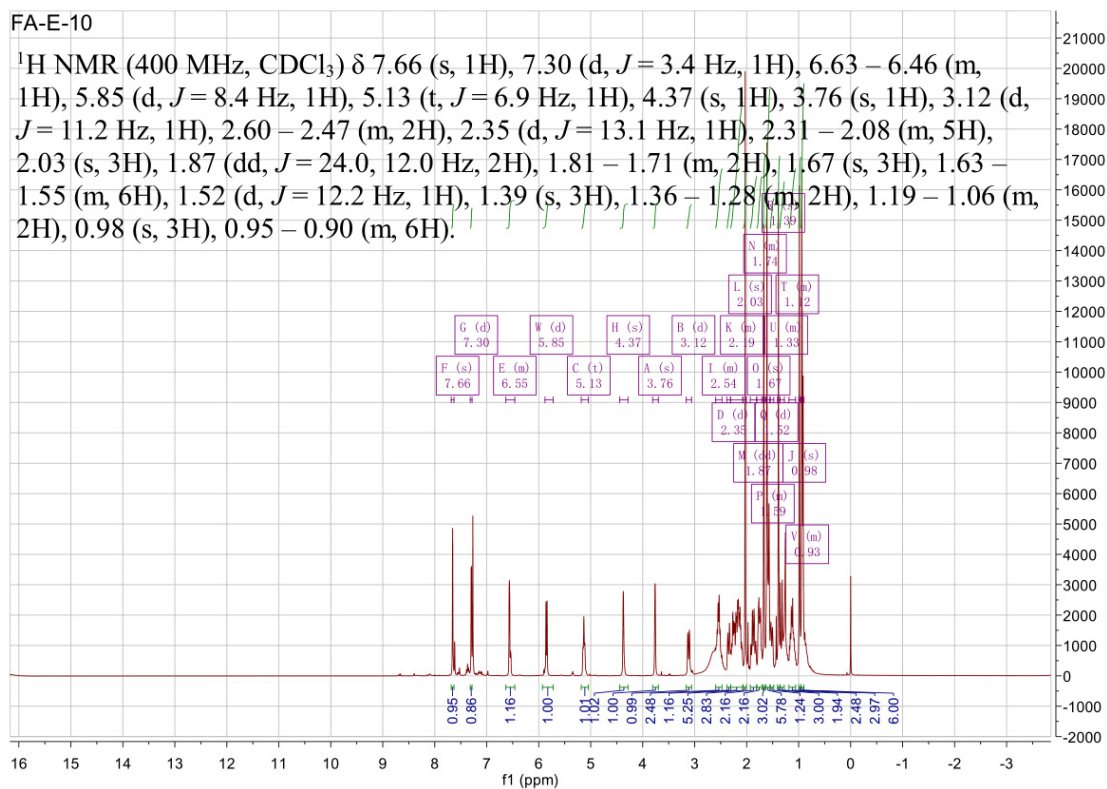

$^1\text{H}$  NMR of compound FA-25

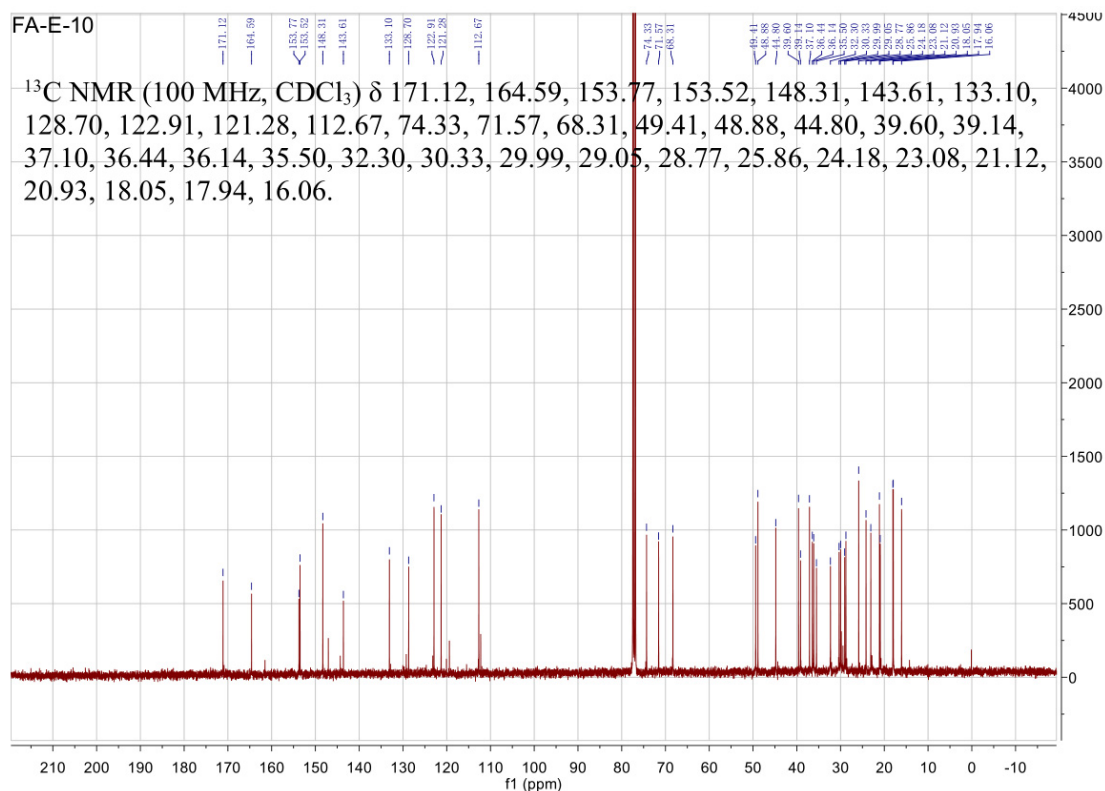

### $^{13}\text{C}$ NMR of compound FA-25

Sample Name 17032203-6  
Comment

Instrument

maXis impact

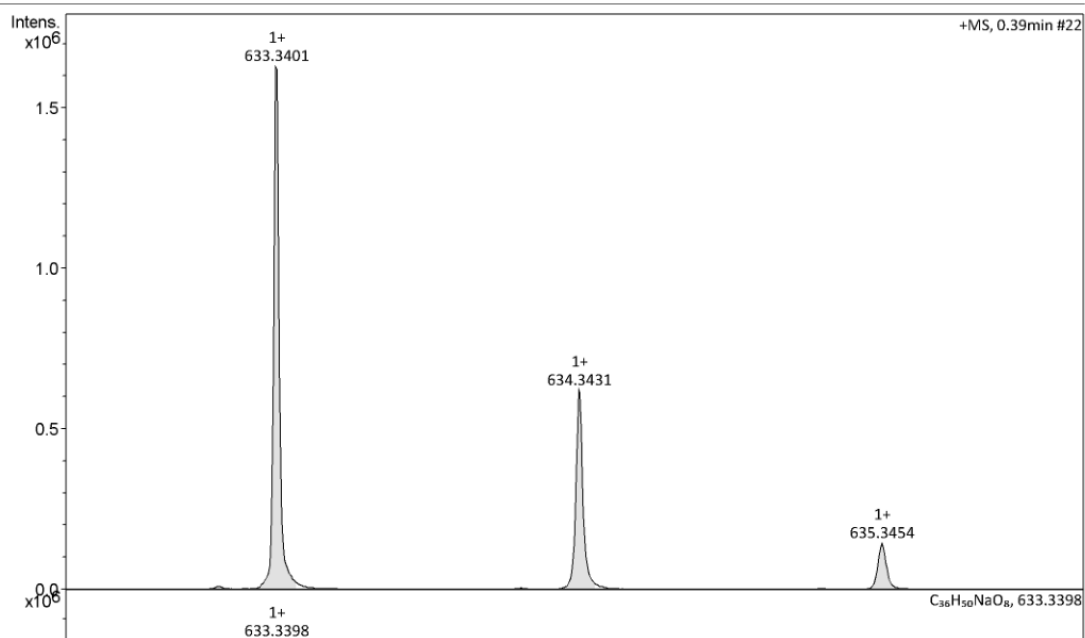

### HRMS of compound FA-25

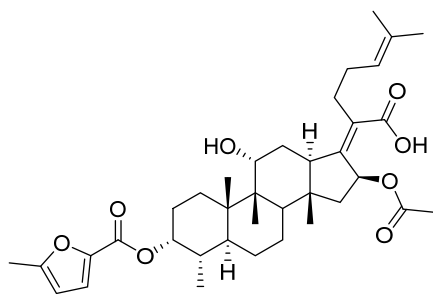

Structure of FA-26

FA-E-23

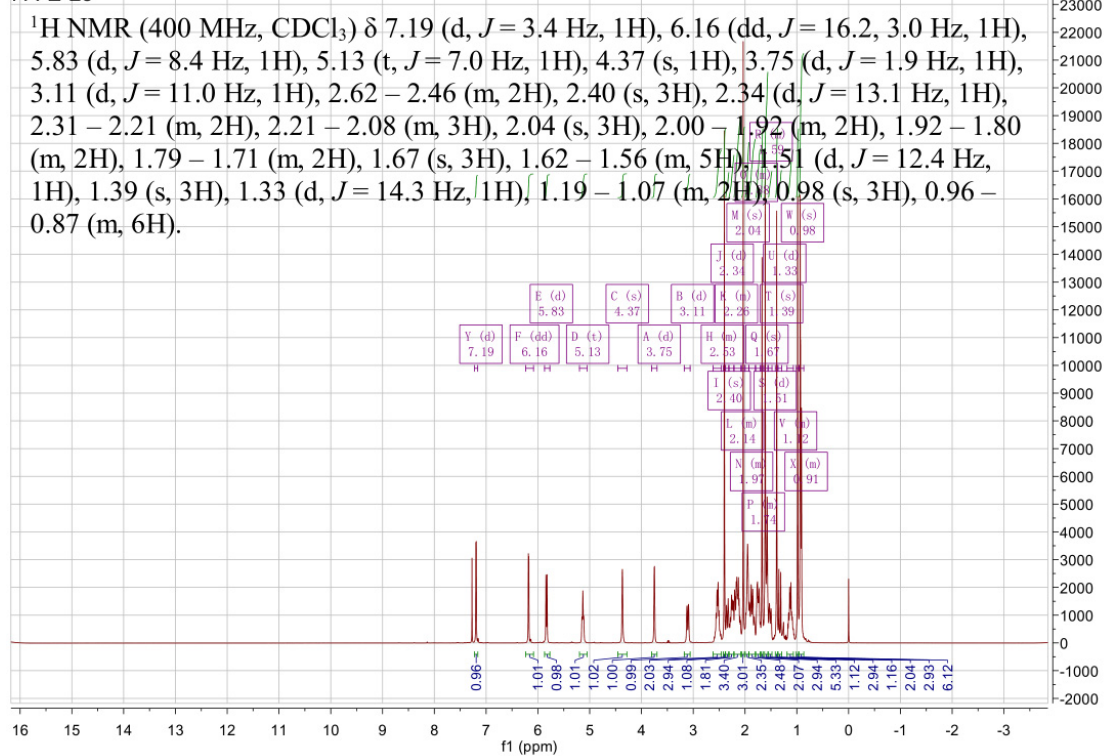

$^1\text{H}$  NMR of compound FA-26

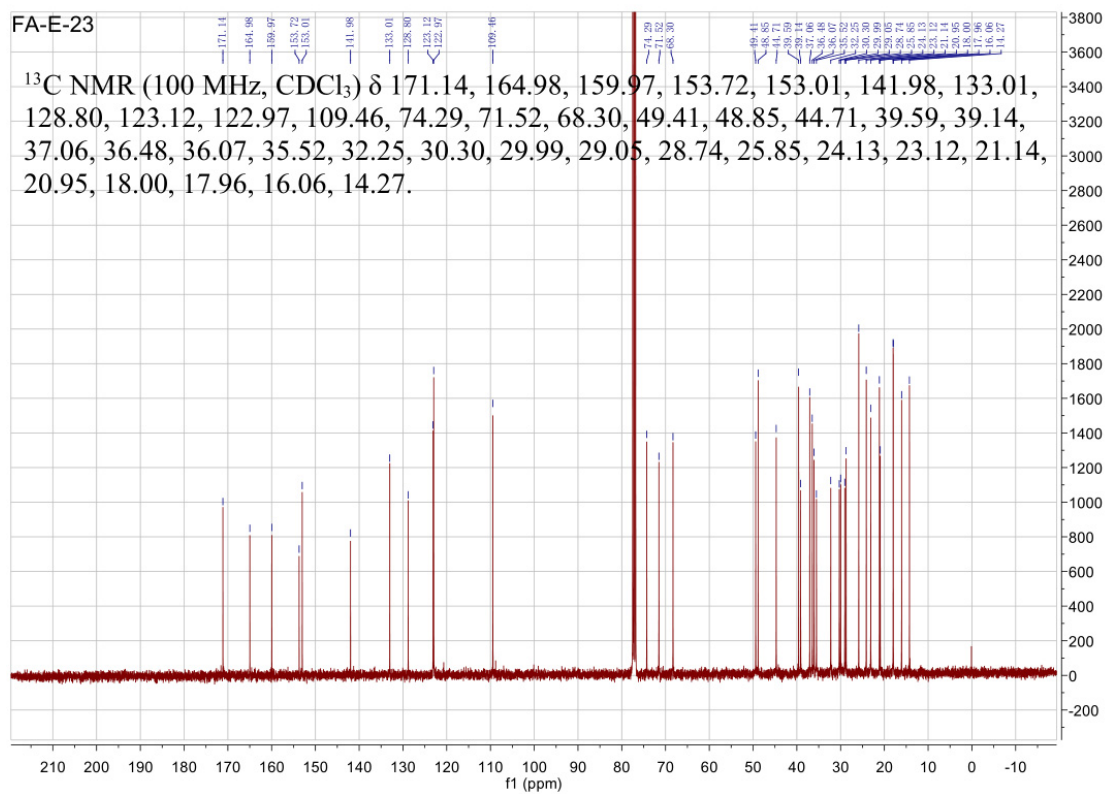

$^{13}\text{C}$  NMR of compound FA-26

Sample Name 17032203-14  
Comment

Instrument maXis impact

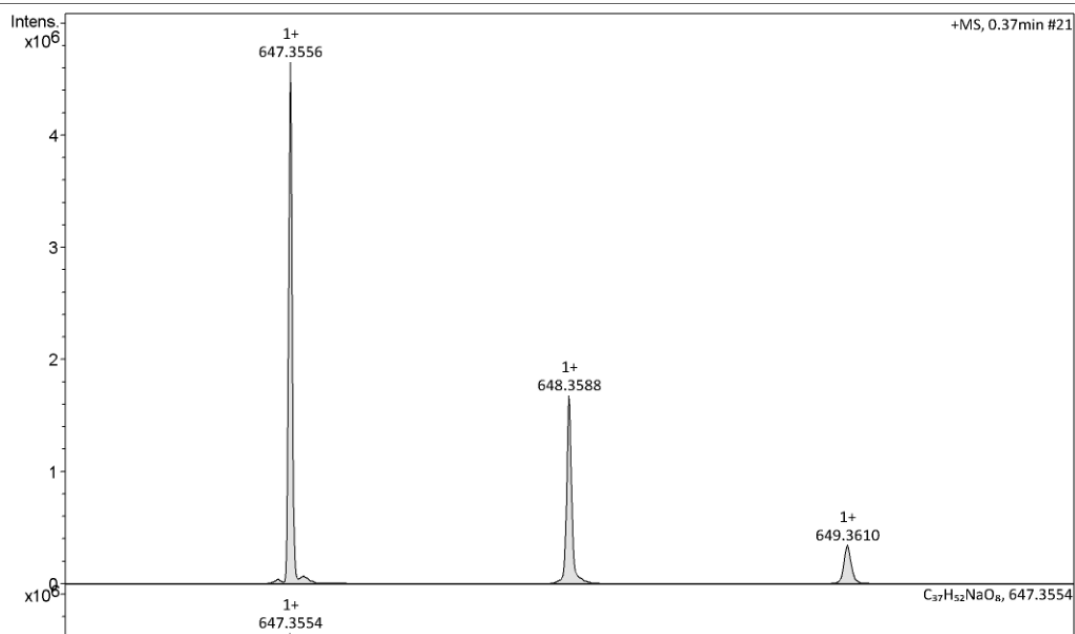

HRMS of compound FA-26
